# Supplementary material for: An efficient strategy for achieving controlled ring-opening polymerization of O-carboxyanhydrides via amine initiation in collaboration with metal-alkoxide catalysis
Source: Royal Society of Chemistry journal article supplement (doi:10.1039/c8py01090k), 2018-01-01
Supplement: c8py01090k1.pdf [file c8py01090k1.pdf]

Supporting information

**An efficient strategy for achieving controlled ring-opening polymerization of *O*-carboxyanhydrides via amine initiation in collaboration with metal-alkoxide catalysis**

Yanzhao Nie,<sup>a</sup> Pei Wang,<sup>a</sup> Haifeng Du,<sup>b</sup> Wei Meng,<sup>b,\*</sup> and Jing Yang<sup>a,\*</sup>

<sup>a</sup> State Key Laboratory of Chemical Resource Engineering, Beijing Key Laboratory of Bioprocess, College of Life Science and Technology, Beijing University of Chemical Technology, Beijing 100029, China.

<sup>b</sup> Beijing National Laboratory for Molecular Sciences, CAS Key Laboratory of Molecular Recognition and Function, Institute of Chemistry, Chinese Academy of Sciences, Beijing 100190, China.

Corresponding address: yangj@mail.buct.edu.cn; mengwei@iccas.ac.cn

## Experimental Section.

### General Methods.

All polymerizations were carried out in a dry and oxygen-free nitrogen atmosphere by using Schlenk techniques or under a nitrogen atmosphere in a Vigor glovebox. Anhydrous dichloromethane (DCM), anhydrous dimethylformamide (DMF), anhydrous chloroform (TCM), anhydrous 1,4-dioxane,  $\text{ZnMe}_2$  (1.0 M in toluene), sodium nitrite and L-phenylalanine were purchased from J&K SCIENTIFIC LTD and used without treatment.  $\text{Zn}(\text{OTf})_2$  and  $\text{Zn}(\text{OAc})_2$  were purchased from Alfa Aesar and used without treatment. Triphosgene purchased from Innochem was used without treatment. Toluene, hexane, pentane and tetrahydrofuran (THF) were distilled over sodium/benzophenone and stored over 4Å molecular sieves prior to use. 1-Hexylamine purchased from Acros was directly used without treatment. Aniline, benzylamine, cyclohexylamine were dried with KOH for overnight, following distillation in vacuum three times.  $\text{CDCl}_3$  and  $\text{C}_6\text{D}_6$  were purchased from Cambridge Isotope Laboratories Inc, and THF- $d_8$  was purchased from J&K SCIENTIFIC LTD.  $\text{CDCl}_3$  was distilled over  $\text{CaH}_2$  and stored over 4Å molecular sieves.  $\text{C}_6\text{D}_6$  and THF- $d_8$  were dried over 4Å molecular sieve prior to use.

### Characterization.

The  $^1\text{H}$  NMR were carried out on a 400 MHz or 500 MHz NMR instrument (Bruker Corporation, Germany) at room temperature using  $\text{CDCl}_3$  ( $\delta = 7.26$  ppm for  $^1\text{H}$  NMR, 77.16 ppm for  $^{13}\text{C}$  NMR),  $\text{C}_6\text{D}_6$  or THF- $d_8$  ( $\delta = 1.72$  ppm for  $^1\text{H}$  NMR, 25.31 ppm for  $^{13}\text{C}$  NMR) as solvent. GPC measurements were carried out by Agilent LC 1260 instrument equipped with a differential refractive-index detector. One guard column and two 7.5 x 300 mm PLgel MIXED-C columns were used. The measurements were performed using THF as eluent (flow rate of 1.0 mL/min at 35 °C), and polystyrene standards were employed for calibration. Polymer solutions with concentrations between 3.0 and 5.0 mg/mL were injected at an injection volume of 40  $\mu\text{L}$ . Desorption/ionization-time of flight mass spectrometer (MALDI-TOF MS) experiments were carried out on a Bruker Autoflex III (laser frequency 100 Hz, 355 nm and detector voltage of 1689 V). *In situ* IR study of monomer polymerization was carried out by using ReactIR 15<sup>m</sup> with MCT Detector from METTLER TOLEDO AutoChem. DiComp (Diamond) probe was connected via AgX 6 mm x 2 m Fiber (Silver Halide). Spectra were taken from 2000  $\text{cm}^{-1}$  to 650  $\text{cm}^{-1}$  at 8 wavenumber resolution and the automatic sampling interval was 15 second. In the process of polymerization, the polymerization solution was taken from the system at the determined time, and spotted on the KBr plate for scanning on FT-IR (Nicolet 6700, the accumulation rate was 16 times with 4 wavenumber resolution). The monomer conversion was determined by the intensity ratio between 1760  $\text{cm}^{-1}$  and

1800 cm<sup>-1</sup>, conversion% =  $I_{1760} / (I_{1760} + I_{1800})$ .<sup>1</sup>

### Synthesis of OCA monomers

As reported<sup>2</sup>, PheOCA and ManOCA were synthesized by the modified procedure. The preparation of Phe-OCA as example was described in detailed.

**The preparation of 2-hydroxyl-3-phenylpropanoic acid (HPPA).** L-Phenylalanine (33.04 g, 200 mmol) in 1 M sulfuric acid was diazotized with 5 M sodium nitrite (3.0 equiv, 600 mmol) at 0 °C. The mixture was stirred for 1 h at 0 °C and then kept stirring at room temperature overnight. The reaction mixture was extraction with ethyl acetate (3 × 300 mL). The combined extracts were washed with brine (3 × 100 mL), dried over anhydrous MgSO<sub>4</sub>, filtered and evaporated to give a white solid. Upon recrystallization from diethyl ether, pure 2-hydroxyl-3-phenylpropanoic acid was afforded in a yield of 81%. <sup>1</sup>H NMR (CDCl<sub>3</sub>, 400 MHz, δ ppm): 7.24-7.33 (m, 5H, *ArH*), 4.53 (dd, *J* = 7.2 Hz, 2H, -CH), 3.19- 3.24 (dd, *J* = 14.0 Hz, 1H, CH<sub>2</sub>), 2.98- 3.03 (dd, *J* = 14.0 Hz, 1H, CH<sub>2</sub>). <sup>13</sup>C NMR (CDCl<sub>3</sub>, 100 MHz, δ ppm) : 40.33 (-CH<sub>2</sub>), 71.15 (CH), 127.36 (*ArC*), 128.79 (*ArC*), 129.68 (*ArC*), 135.93 (*ArC*), 177.87 (C=O).

**Preparation of Phe-OCA.** To a solution of HPPA (30.0 mmol) and activated charcoal (~90 mg) in anhydrous THF (30 mL), triphosgene (20 mmol) was added in one portion. The reaction mixture was stirred for 8 hours at room temperature. The mixture was filtered over celite, the filtrate was concentrated and the resulting residue was recrystallized from THF/hexane (v/v = 6/25) four times to give colourless crystal in a yield of 52%. <sup>1</sup>H NMR (CDCl<sub>3</sub>, 500 MHz, δ ppm): 7.34-7.35 (m, 3H, *ArH*), 7.21-7.23 (m, 2H, *ArH*), 5.29 (t, *J* = 4.5 Hz, 1H, CH), 3.36-3.40 (dd, *J* = 15.0 Hz, 1H, CH<sub>2</sub>), 3.22-3.26 (dd, *J* = 15.0 Hz, 1H, CH<sub>2</sub>). <sup>13</sup>C NMR (CDCl<sub>3</sub>, 125 MHz, δ ppm) : 36.57 (-CH<sub>2</sub>), 80.03 (CH), 128.56 (*ArC*), 129.31 (*ArC*), 129.80 (*ArC*), 131.64 (*ArC*), 147.92 (OC=OO), 166.44(C=OO).

Similar operation was performed to prepare Man-OCA. To a solution of (S)-(+)-Mandelic acid (60.0 mmol) and activated charcoal (~900 mg) in anhydrous THF (60 mL), triphosgene (40 mmol) was added and stirred overnight at room temperature. After filtering over celite, the filtrate was concentrated and the resulting residue was recrystallized from THF/hexane (v/v = 1/5) four times to give colourless crystal in a yield of 20%. <sup>1</sup>H NMR (CDCl<sub>3</sub>, 400 MHz, δ ppm): 7.42-7.51 (m, 5H, *ArH*), 6.09 (s, 1H, CH). <sup>13</sup>C NMR (CDCl<sub>3</sub>, 100 MHz, δ ppm): 80.56 (CH), 126.27 (*ArC*), 129.39 (*ArC*), 129.69 (*ArC*), 130.94 (*ArC*), 148.12 (OC=OO), 165.44(C=OO).

### Synthesis of Zn(C<sub>6</sub>F<sub>5</sub>)<sub>2</sub>

$\text{Zn}(\text{C}_6\text{F}_5)_2$  was synthesized according to the literature.<sup>3</sup> A solution of  $\text{B}(\text{C}_6\text{F}_5)_3$  (2.0 g, 4.0 mmol) in anhydrous toluene (40 mL) was treated with a solution of  $\text{ZnMe}_2$  in toluene (6.0 mmol) at room temperature. The mixture was stirred for 30 min. Removal of volatiles left a white solid, which was recrystallized from toluene/light petroleum at  $-20\text{ }^\circ\text{C}$  to give  $\text{Zn}(\text{C}_6\text{F}_5)_2$  (1.23 g) as needlelike crystal in a yield of 77%.  $^{19}\text{F}$  NMR ( $\text{C}_6\text{D}_6$ , 376 MHz,  $\delta$  ppm): 117.98 (m, 4F, *o-F*), 152.53 (t,  $J = 18.8$  Hz, 2F, *p-F*), 160.53 (m, 4F, *m-F*).

### Polymerization procedure.

A typical procedure for polymerization of Phe-OCA was performed in a 25 mL Schlenk in a Vigor glovebox. The given amount of Lewis acid and 1-hexylamine was stirred in 1.0 mL anhydrous THF before taken out from the glovebox. The reaction mixture was then connected to a vacuum line and stirred for 10 min at  $50\text{ }^\circ\text{C}$ , followed by adding 144.2 mg PheOCA (0.75 mmol). After a specific time, a small aliquot of polymer solution was taken out for determining monomer conversion. The final reaction solution was precipitated in the mixture of diethyl ether/hexane ( $v/v = 1/2$ ), and washed twice using the same solution. The obtained polymers were dried under vacuum.

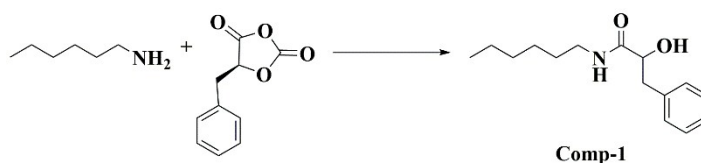

**Scheme S1.** Preparation route of Comp-1.

**Preparation of *N*-hexyl-2-hydroxyl-3-phenyl-propanamide (Comp-1).** Phe-OCA (288.3 mg, 1.5 mmol) in 2.0 mL dry THF was treated with 1-hexyl- $\text{NH}_2$  (151.8 mg, 1.5 mmol) at  $50\text{ }^\circ\text{C}$ . After PheOCA was completely consumed by FTIR monitoring, the mixture was concentrated in vacuum and followed by flash chromatography (DCM/methanol  $v/v = 99/1$ ). The obtained crude product was recrystallized in dry THF, and then dried under vacuum to give a white crystal in a yield of 86%.

### Computational Details

All calculations were performed with the Gaussian 09 program.<sup>4</sup> Geometry optimizations of all stationary points for the FLP controlled ring-opening polymerization reaction of *O*-

carboxyanhydrides (OCAs) were performed with the M06-2X functional,<sup>5</sup> which has been proven to be suitable to describe the dispersion effects. The 6-31G(d) basis set<sup>6</sup> was applied for all elements in substrates and the latent catalytic species. Frequency calculations at the same level were performed to confirm each stationary point to be either a minimum or a transition structure. Intrinsic reaction coordinate (IRC)<sup>7</sup> calculations were performed to confirm the connection of each transition state to its corresponding reactant and product. All figures of structures were prepared using CYLView.<sup>8</sup>

**Table S1. ROP of Phe-OCA initiated by Zn(C<sub>6</sub>F<sub>5</sub>)<sub>2</sub> and 1-hexyl-NH<sub>2</sub>**

| Run | Solvent                         | Zn(C <sub>6</sub> F <sub>5</sub> ) <sub>2</sub> : 1-hexyl-NH <sub>2</sub> :M <sup>a</sup> | Temp. (°C) | Time (h) | Conv. <sup>b</sup> (%) | $M_{n, \text{cald}}^{\text{c}}$ (kg/mol) | $M_{n, \text{NMR}}^{\text{d}}$ (kg/mol) | $M_{n, \text{GPC}}$ (kg/mol) | $\bar{D}^{\text{e}}$ |
|-----|---------------------------------|-------------------------------------------------------------------------------------------|------------|----------|------------------------|------------------------------------------|-----------------------------------------|------------------------------|----------------------|
| 1   | CH <sub>2</sub> Cl <sub>2</sub> | 1:1:50                                                                                    | 25         | 24       | 28                     | 2.2                                      | —                                       | —                            | —                    |
| 2   | CHCl <sub>3</sub>               | 1:1:50                                                                                    | 25         | 24       | 27                     | 2.1                                      | —                                       | —                            | —                    |
| 3   | dioxane                         | 1:1:50                                                                                    | 25         | 4        | >99                    | 7.5                                      | —                                       | 1.6                          | 1.36                 |
| 4   | DMF                             | 1:1:50                                                                                    | 25         | 0.5      | >99                    | 7.5                                      | —                                       | 5.2                          | 1.26                 |
| 5   | THF                             | 1:1:50                                                                                    | 25         | 5        | >99                    | 7.5                                      | 7.6                                     | 7.4                          | 1.08                 |
| 6   | THF                             | 0:1:50                                                                                    | 25         | 24       | 0                      | 0                                        | —                                       | —                            | —                    |
| 7   | THF                             | 1:0:50                                                                                    | 25         | 24       | 38                     | 2.9                                      | —                                       | 0.6                          | 2.78                 |
| 8   | THF                             | 1:1:50                                                                                    | 40         | 2.5      | >99                    | 7.5                                      | 7.6                                     | 7.7                          | 1.08                 |
| 9   | THF                             | 1:1:50                                                                                    | 50         | 1.5      | >99                    | 7.5                                      | 7.6                                     | 7.4                          | 1.08                 |
| 10  | THF                             | 1:1:50                                                                                    | 60         | 1.0      | >99                    | 7.5                                      | 8.6                                     | 8.3                          | 1.08                 |

Note: <sup>a</sup> Indicating the molar ratio of Zn(C<sub>6</sub>F<sub>5</sub>)<sub>2</sub>, initiator and monomer. <sup>b</sup> The monomer conversion was determined by the intensity ratio between the peaks at 1760 cm<sup>-1</sup> and 1800 cm<sup>-1</sup> in FT-IR spectroscopy. Conv.% =  $I_{1760} / (I_{1760} + I_{1800})$ . <sup>c</sup> Calculated by  $[M]_0/[I]_0 \times (M_w \text{ of monomer} - M_w \text{ of CO}_2) \times \text{monomer conversion} + M_w \text{ of initiator}$ . <sup>d</sup> Determined from the relative integration of the signals of the backbone methine units and chain ends in <sup>1</sup>H NMR spectra. <sup>e</sup> Measured by GPC in THF against polystyrene standards.

**Table S2. ROP of Phe-OCA initiated by Zn(C<sub>6</sub>F<sub>5</sub>)<sub>2</sub> and 1-hexyl-NH<sub>2</sub> varying molar ratio.**

| Run | Solvent | Zn(C <sub>6</sub> F <sub>5</sub> ) <sub>2</sub> : 1-hexyl-NH <sub>2</sub> :M <sup>a</sup> | Temp. (°C) | Time (h) | Conv. <sup>b</sup> (%) | $M_{n, \text{cald}}^{\text{c}}$ (kg/mol) | $M_{n, \text{NMR}}^{\text{d}}$ (kg/mol) | $M_{n, \text{GPC}}$ (kg/mol) <sup>e</sup> | $\bar{D}^{\text{e}}$ |
|-----|---------|-------------------------------------------------------------------------------------------|------------|----------|------------------------|------------------------------------------|-----------------------------------------|-------------------------------------------|----------------------|
| 1   | THF     | 0.5:1:50                                                                                  | 50         | 19       | >99                    | 7.5                                      | 6.0                                     | 6.1                                       | 1.10                 |
| 2   | THF     | 1.5:1:50                                                                                  | 50         | 0.6      | >99                    | 7.5                                      | 7.4                                     | 7.3                                       | 1.08                 |
| 3   | THF     | 2.0:1:50                                                                                  | 50         | 0.3      | >99                    | 7.5                                      | 7.1                                     | 7.1                                       | 1.08                 |
| 4   | THF     | 5.0:1:50                                                                                  | 50         | 0.2      | >99                    | 7.5                                      | 8.3                                     | 7.6                                       | 1.07                 |
| 5   | THF     | 10.0:1:50                                                                                 | 50         | 0.2      | >99                    | 7.5                                      | 7.9                                     | 7.4                                       | 1.08                 |

Note: <sup>a</sup> Indicating the molar ratio of Zn(C<sub>6</sub>F<sub>5</sub>)<sub>2</sub>, initiator and monomer. <sup>b</sup> The monomer conversion was determined by the intensity ratio between the peaks at 1760 cm<sup>-1</sup> and 1800 cm<sup>-1</sup> in FT-IR spectroscopy. Conv.% =  $I_{1760} / (I_{1760} + I_{1800})$ . <sup>c</sup> Calculated by  $[M]_0/[I]_0 \times (M_w \text{ of monomer} - M_w \text{ of CO}_2) \times \text{monomer conversion} + M_w \text{ of initiator}$ .

CO<sub>2</sub>) $\times$ monomer conversion +  $M_w$  of initiator. <sup>d</sup> Determined from the relative integration of the signals of the backbone methine units and chain ends in <sup>1</sup>H NMR spectra. <sup>e</sup> Measured by GPC in THF against polystyrene standards.

## References.

1. Quan Y F, and Rong T. *J. Am. Chem. Soc.*, **2017**, *139*, 6177.
2. Qian Y, Rong T, Yun X X, Lawrence W. D, Timothy M. F, Jian J C. *Biomacromolecules* **2013**, *14*, 920.
3. (a) Mathias L, Axel S, Alexander V, *Angew. Chem. Int. Ed.*, **2009**, *48*, 7444-7447. (b) Dennis A. W, Timothy J. W, David L. H, Manfred B, *Organometallics*, **2001**, *20*, 3772.
4. Gaussian 09, Revision D.01, Frisch, M. J.; Trucks, G. W.; Schlegel, H. B.; Scuseria, G. E.; Robb, M. A.; Cheeseman, J. R.; Scalmani, G.; Barone, V.; Mennucci, B.; Petersson, G. A.; Nakatsuji, H.; Caricato, M.; Li, X.; Hratchian, H. P.; Izmaylov, A. F.; Bloino, J.; Zheng, G.; Sonnenberg, J. L.; Hada, M.; Ehara, M.; Toyota, K.; Fukuda, R.; Hasegawa, J.; Ishida, M.; Nakajima, T.; Honda, Y.; Kitao, O.; Nakai, H.; Vreven, T.; Montgomery, Jr., J. A.; Peralta, J. E.; Ogliaro, F.; Bearpark, M.; Heyd, J. J.; Brothers, E.; Kudin, K. N.; Staroverov, V. N.; Keith, T.; Kobayashi, R.; Normand, J.; Raghavachari, K.; Rendell, A.; Burant, J. C.; Iyengar, S. S.; Tomasi, J.; Cossi, M.; Rega, N.; Millam, J. M.; Klene, M.; Knox, J. E.; Cross, J. B.; Bakken, V.; Adamo, C.; Jaramillo, J.; Gomperts, R.; Stratmann, R. E.; Yazyev, O.; Austin, A. J.; Cammi, R.; Pomelli, C.; Ochterski, J. W.; Martin, R. L.; Morokuma, K.; Zakrzewski, V. G.; Voth, G. A.; Salvador, P.; Dannenberg, J. J.; Dapprich, S.; Daniels, A. D.; Farkas, O.; Foresman, J. B.; Ortiz, J. V.; Cioslowski, J.; Fox, D. J. Gaussian, Inc., Wallingford CT, 2013.
5. (a) Zhao, Y.; Truhlar, D. G. *Acc. Chem. Res.* **2008**, *41*, 157. (b) Zhao, Y.; Truhlar, D. G. *Theor. Chem. Acc.* **2008**, *120*, 215.
6. For the 6-31G(d) basis set, see: (a) Ditchfield, R.; Hehre, W. J.; Pople, J. A. *J. Chem. Phys.* **1971**, *54*, 724. (b) Hehre, W. J.; Ditchfield, R.; Pople, J. A. *J. Chem. Phys.* **1972**, *56*, 2257. (c) Hariharan, P. C.; Pople, J. A. *Theor. Chim. Acta* **1973**, *28*, 213. (d) Dill, J. D.; Pople, J. A. *J. Chem. Phys.* **1975**, *62*, 2921. (e) Francl, M. M.; Pietro, W. J.; Hehre, W. J.; Binkley, J. S.; Gordon, M. S.; DeFrees, D. J.; Pople, J. A. *J. Chem. Phys.* **1982**, *77*, 3654. (f) Hehre, W. J.; Radom, L.; Schleyer, P. v. R.; Pople, J. A. *Ab Initio Molecular Orbital Theory*; Wiley: New York, 1986.
7. (a) Gonzalez, C.; Schlegel, H. B. *J. Phys. Chem.* **1990**, *94*, 5523. (b) Gonzalez, C.; Schlegel, H. B.

*J. Chem. Phys.* **1989**, *90*, 2154.

8. Legault, C. Y. CYLview, 1.0b; Université de Sherbrooke: Sherbrooke, Québec, Canada, 2009;  
<http://www.cylview.org>.

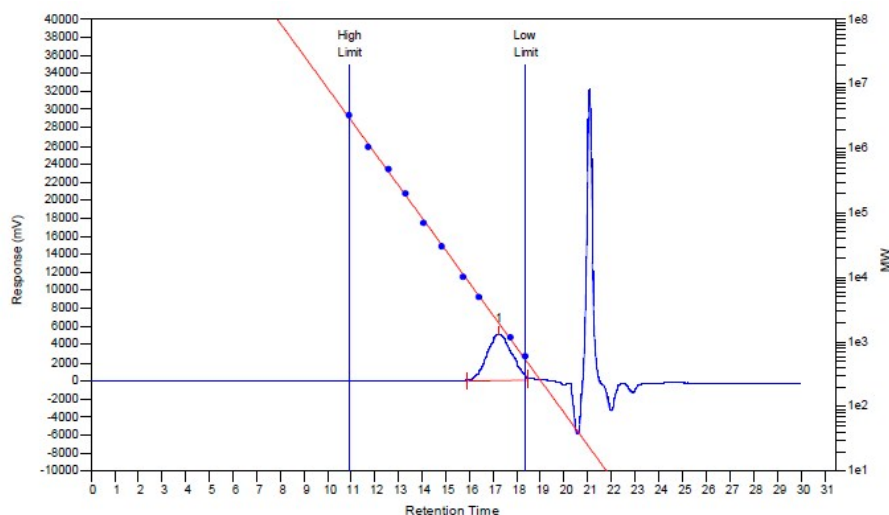

**Figure S1.** GPC curve of Phe-OCA polymerization in the presence of  $\text{Zn}(\text{C}_6\text{F}_5)_2$  and 1-hexyl- $\text{NH}_2$  in dioxane at 25 °C.  $[\text{Phe-OCA}] = 0.75 \text{ M}$  and  $\text{Phe-OCA}/\text{Zn}(\text{C}_6\text{F}_5)_2/1\text{-hexyl-NH}_2 = 50/1/1$ .

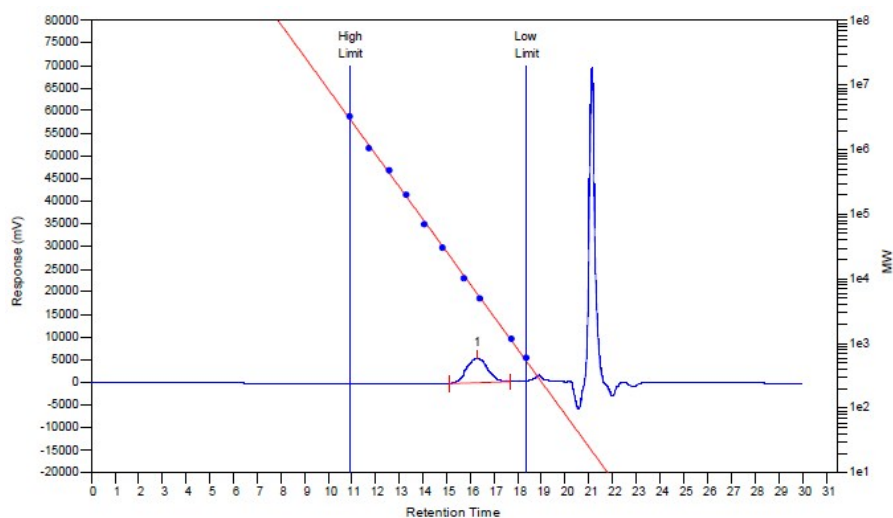

**Figure S2.** GPC curve of Phe-OCA polymerization in the presence of  $\text{Zn}(\text{C}_6\text{F}_5)_2$  and 1-hexyl- $\text{NH}_2$  in DMF at 25 °C.  $[\text{Phe-OCA}] = 0.75 \text{ M}$  and  $\text{Phe-OCA}/\text{Zn}(\text{C}_6\text{F}_5)_2/1\text{-hexyl-NH}_2 = 50/1/1$ .

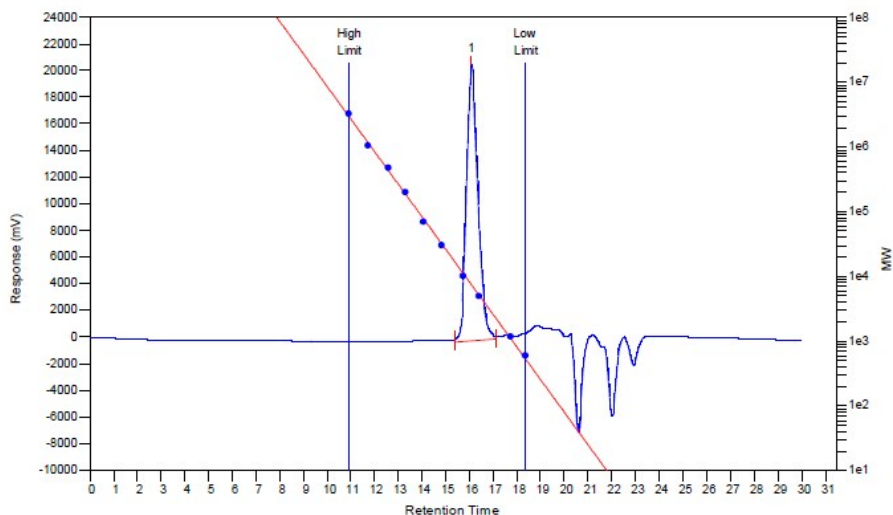

**Figure S3.** GPC curve of Phe-OCA polymerization in the presence of  $\text{Zn}(\text{C}_6\text{F}_5)_2$  and 1-hexyl- $\text{NH}_2$  in THF at 25 °C.  $[\text{Phe-OCA}] = 0.75 \text{ M}$  and  $\text{Phe-OCA}/\text{Zn}(\text{C}_6\text{F}_5)_2/1\text{-hexyl-NH}_2 = 50/1/1$ .

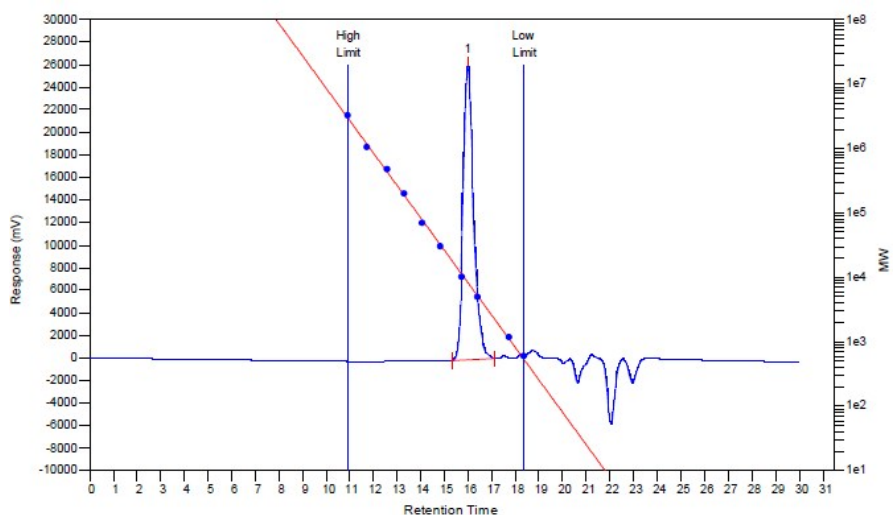

**Figure S4.** GPC curve of Phe-OCA polymerization in the presence of  $\text{Zn}(\text{C}_6\text{F}_5)_2$  and 1-hexyl- $\text{NH}_2$  in THF at 40 °C.  $[\text{Phe-OCA}] = 0.75 \text{ M}$  and  $\text{Phe-OCA}/\text{Zn}(\text{C}_6\text{F}_5)_2/1\text{-hexyl-NH}_2 = 50/1/1$ .



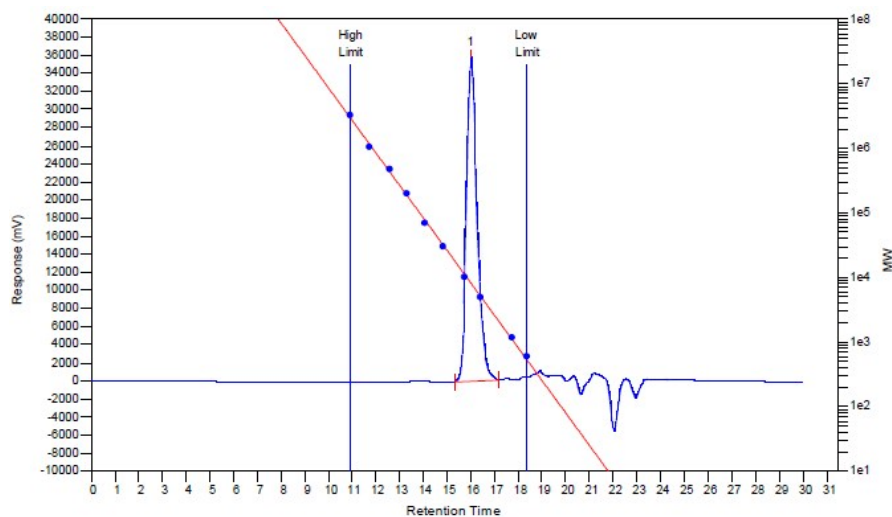

**Figure S5.** GPC curve of Phe-OCA polymerization in the presence of  $\text{Zn}(\text{C}_6\text{F}_5)_2$  and 1-hexyl- $\text{NH}_2$  in THF at 50 °C.  $[\text{Phe-OCA}] = 0.75 \text{ M}$  and  $\text{Phe-OCA}/\text{Zn}(\text{C}_6\text{F}_5)_2/1\text{-hexyl-NH}_2 = 50/1/1$ .

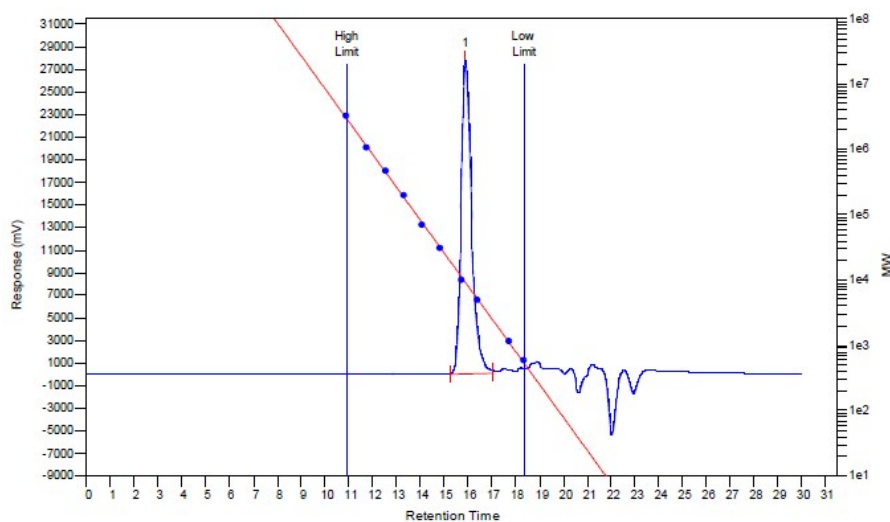

**Figure S6.** GPC curve of Phe-OCA polymerization in the presence of  $\text{Zn}(\text{C}_6\text{F}_5)_2$  and 1-hexyl- $\text{NH}_2$  in THF at 60 °C.  $[\text{Phe-OCA}] = 0.75 \text{ M}$  and  $\text{Phe-OCA}/\text{Zn}(\text{C}_6\text{F}_5)_2/1\text{-hexyl-NH}_2 = 50/1/1$ .

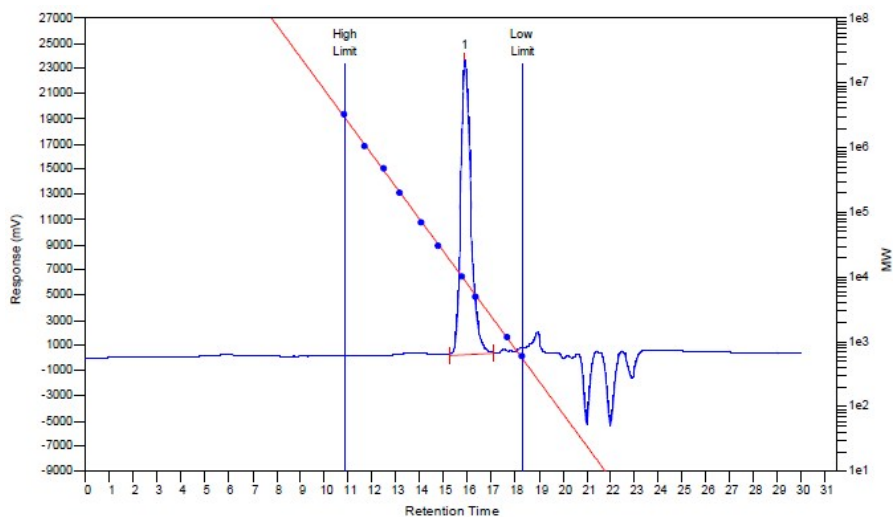

**Figure S7.** GPC curve of Phe-OCA polymerization in the presence of  $\text{Zn}(\text{C}_6\text{F}_5)_2$  and cyclohex- $\text{NH}_2$  in THF at 50 °C.  $[\text{Phe-OCA}] = 0.75 \text{ M}$  and  $\text{Phe-OCA}/\text{Zn}(\text{C}_6\text{F}_5)_2/\text{cyclohex-NH}_2 = 50/1/1$ .

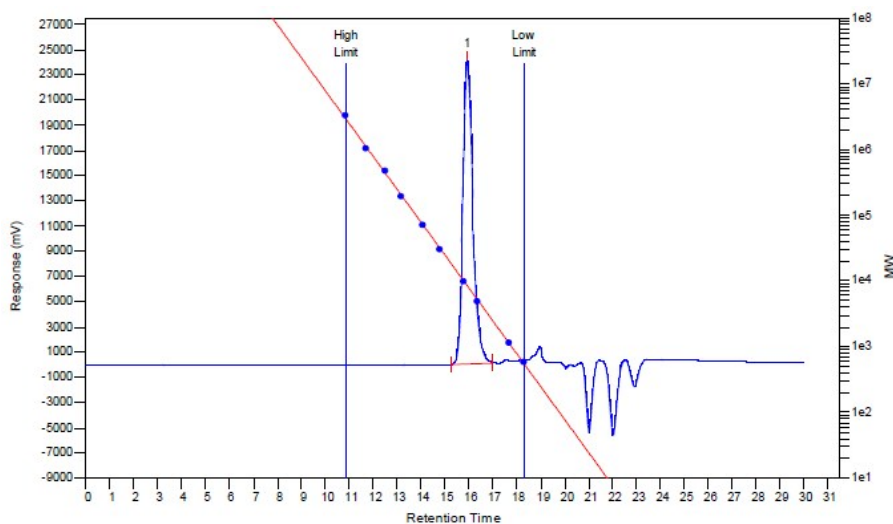

**Figure S8.** GPC curve of Phe-OCA polymerization in the presence of  $\text{Zn}(\text{C}_6\text{F}_5)_2$  and benzy- $\text{NH}_2$  in THF at 50 °C.  $[\text{Phe-OCA}] = 0.75 \text{ M}$  and  $\text{Phe-OCA}/\text{Zn}(\text{C}_6\text{F}_5)_2/\text{benzyl-NH}_2 = 50/1/1$ .

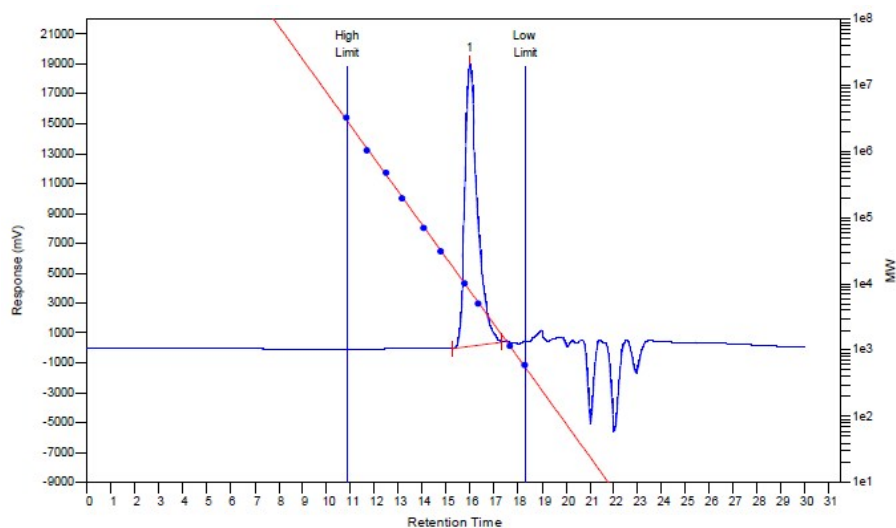

**Figure S9.** GPC curve of Phe-OCA polymerization in the presence of  $\text{Zn}(\text{C}_6\text{F}_5)_2$  and phenyl- $\text{NH}_2$  in THF at 50 °C.  $[\text{Phe-OCA}] = 0.75 \text{ M}$  and  $\text{Phe-OCA}/\text{Zn}(\text{C}_6\text{F}_5)_2/\text{phenyl-NH}_2 = 50/1/1$ .

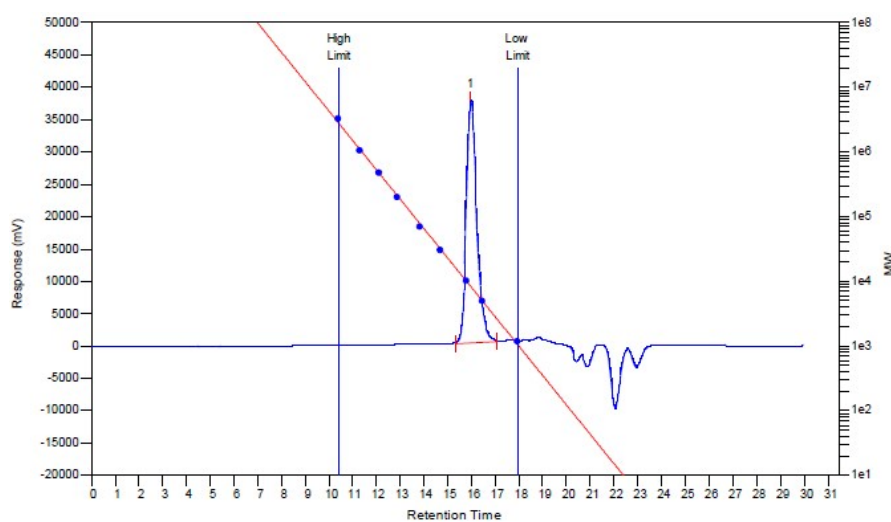

**Figure S10.** GPC curve of Phe-OCA polymerization in the presence of  $\text{Zn}(\text{C}_6\text{F}_5)_2$  and diethylamine in THF at 50 °C.  $[\text{Phe-OCA}] = 0.75 \text{ M}$  and  $\text{Phe-OCA}/\text{Zn}(\text{C}_6\text{F}_5)_2/\text{diethylamine} = 50/1/1$ .

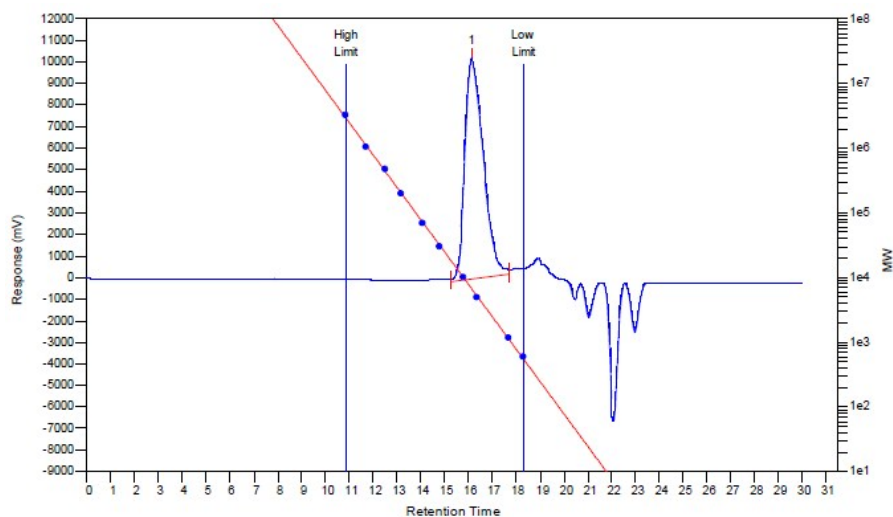

**Figure S11.** GPC curve of Phe-OCA polymerization in the presence of  $\text{Zn}(\text{C}_6\text{F}_5)_2$  and 1-hexyl-OH in THF at 50 °C.  $[\text{Phe-OCA}] = 0.75 \text{ M}$  and  $\text{Phe-OCA}/\text{Zn}(\text{C}_6\text{F}_5)_2/1\text{-hexyl-OH} = 50/1/1$ .

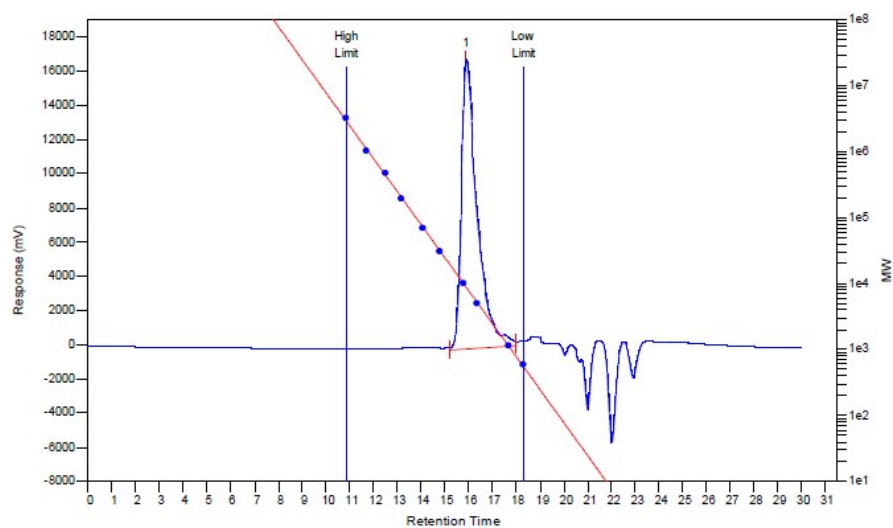

**Figure S12.** GPC curve of Phe-OCA polymerization in the presence of  $\text{Zn}(\text{C}_6\text{F}_5)_2$  and benzyl-OH in THF at 50 °C.  $[\text{Phe-OCA}] = 0.75 \text{ M}$  and  $\text{Phe-OCA}/\text{Zn}(\text{C}_6\text{F}_5)_2/\text{benzyl-OH} = 50/1/1$ .

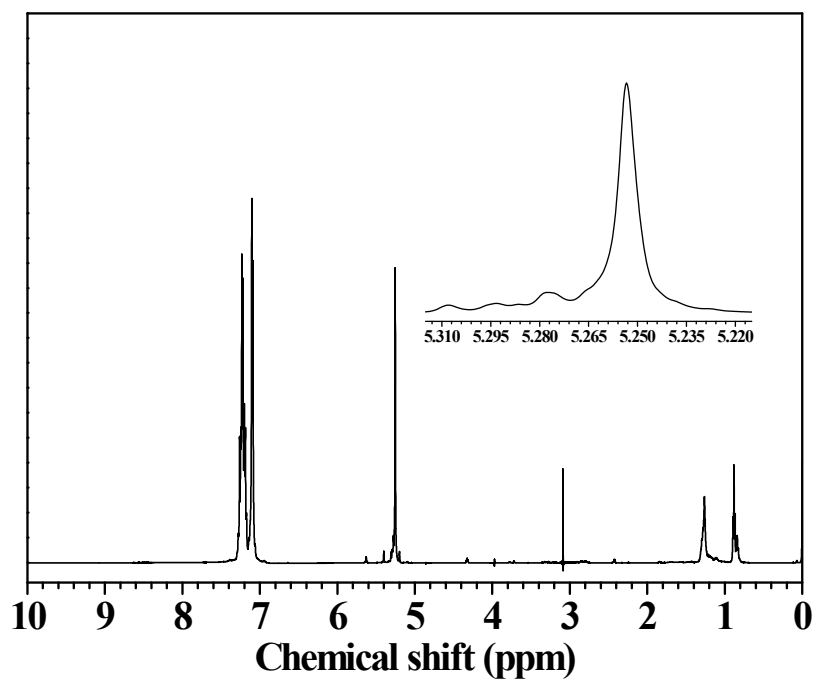

**Figure S13.** Homonuclear decoupled <sup>1</sup>H NMR spectrum of Poly(1) mediated by Zn(C<sub>6</sub>F<sub>5</sub>)<sub>2</sub> and 1-hexyl-amine at the feeding ratio of 50/1/1.

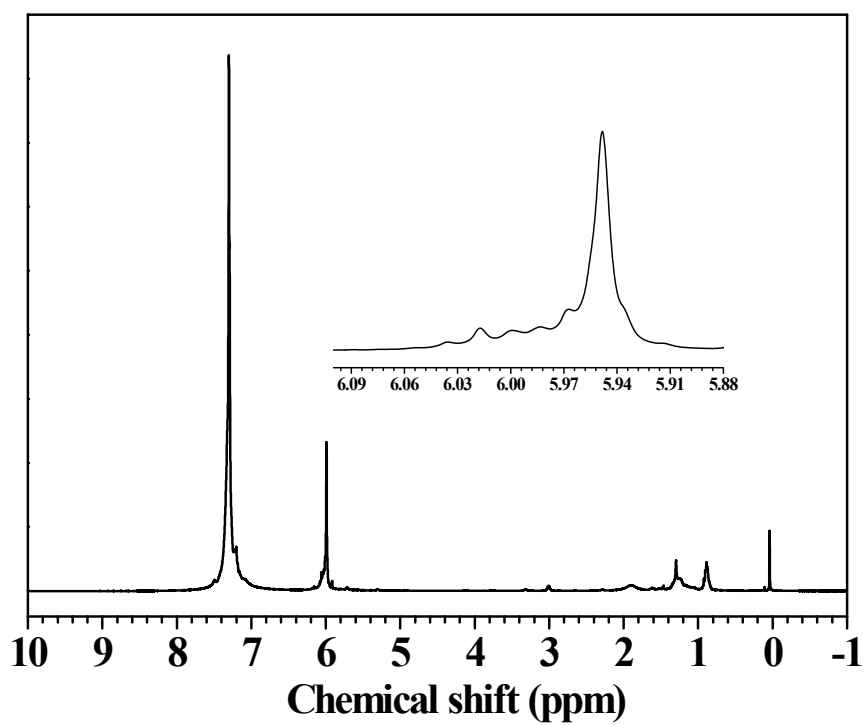

**Figure S14.** <sup>1</sup>H NMR spectrum of Poly(2) mediated by Zn(C<sub>6</sub>F<sub>5</sub>)<sub>2</sub> and 1-hexyl-amine at the feeding ratio of 50/1/1.

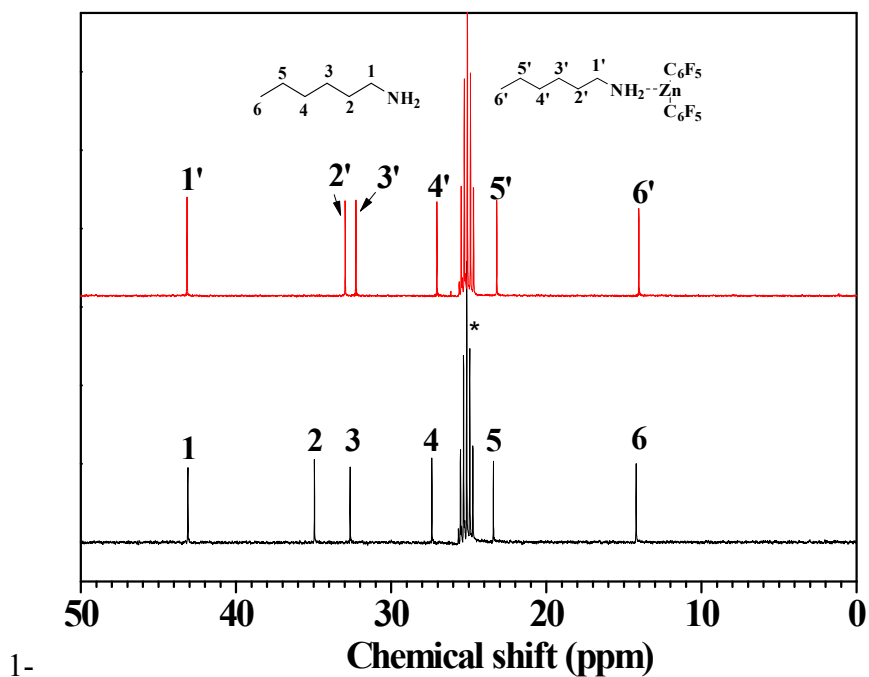

**Figure S15.**  $^{13}\text{C}$  NMR spectra of 1-hexyl- $\text{NH}_2$  before and after the addition of  $\text{Zn}(\text{C}_6\text{F}_5)_2$  at 25 °C. The peaks marked as asterisk were deuterated THF.

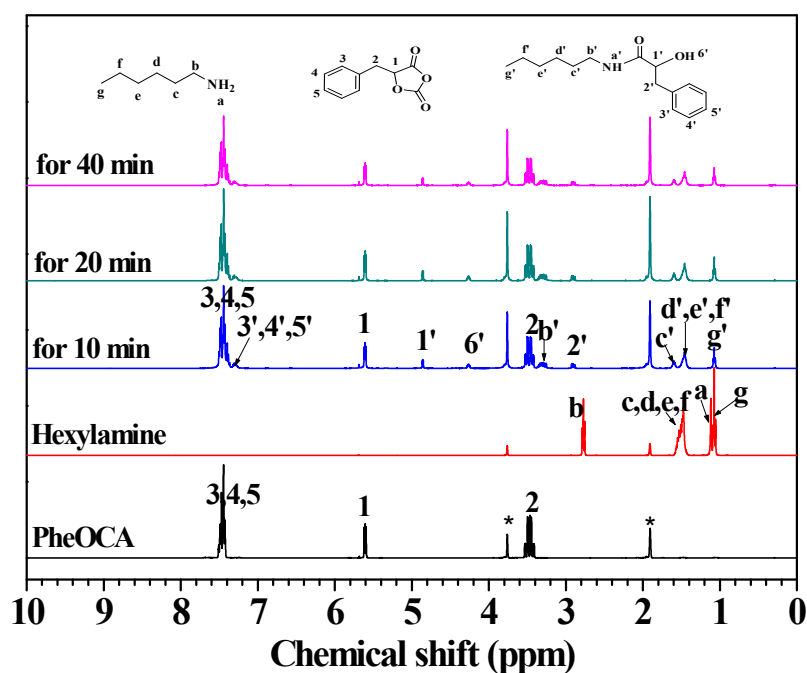

**Figure S16.**  $^1\text{H}$  NMR spectra of the ring-opening of Phe-OCA initiated by 1-hexyl- $\text{NH}_2$  alone at 25 °C. The peaks marked as asterisk were deuterated THF.

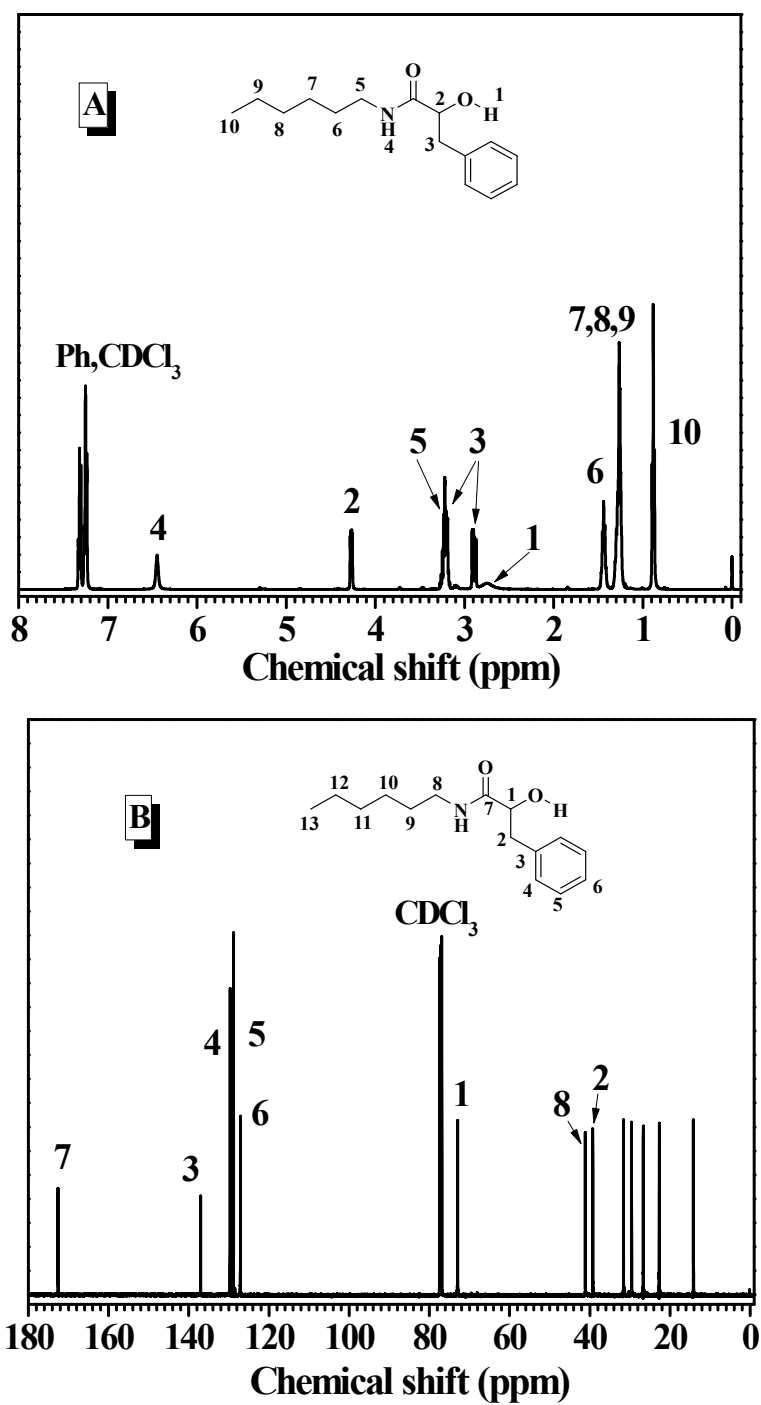

**Figure S17.** NMR spectra of *N*-hexyl-2-hydroxy-3-phenyl-propanamide (Comp 1). (A)  $^1\text{H}$  NMR spectrum; (B)  $^{13}\text{C}$  NMR spectrum.

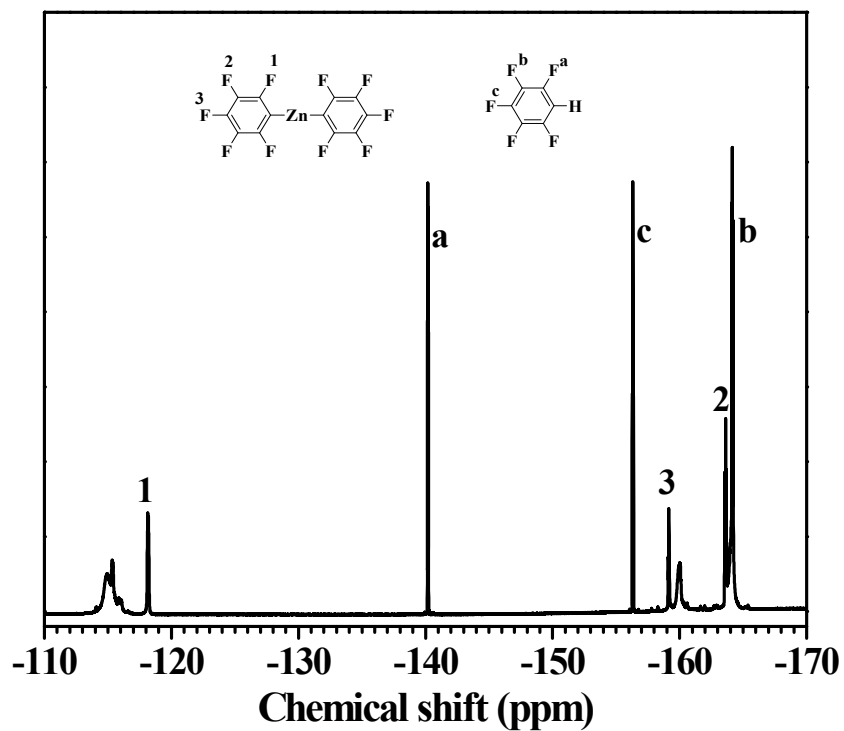

**Figure S18.**  $^{19}\text{F}$  NMR spectrum of  $\text{Zn}(\text{C}_6\text{F}_5)_2$  after adding Comp 1 with molar ratio of 1 to 1.

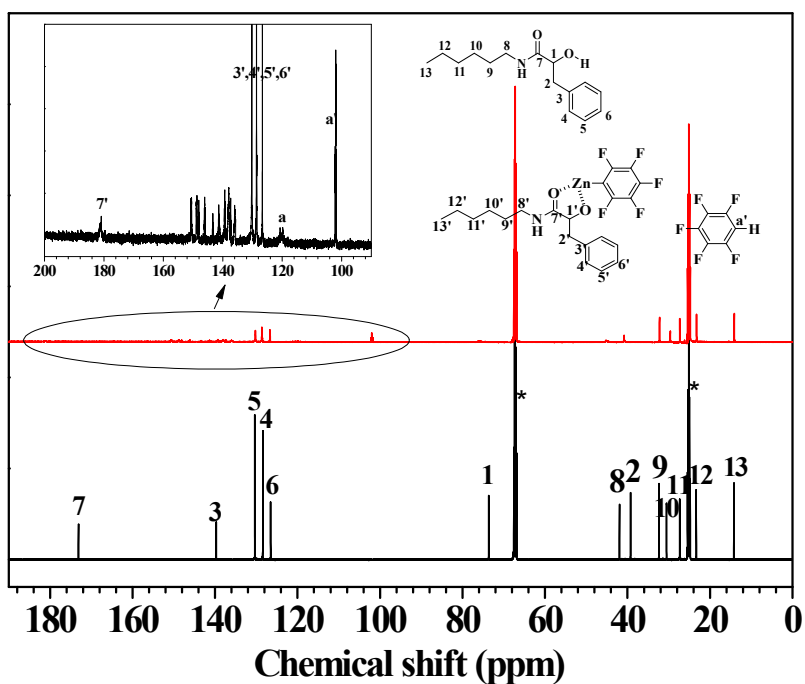

**Figure S19.**  $^{13}\text{C}$  NMR spectra of Comp 1 before and after adding  $\text{Zn}(\text{C}_6\text{F}_5)_2$  with molar ratio of 1 to 1. The peaks marked as asterisk were deuterated THF.



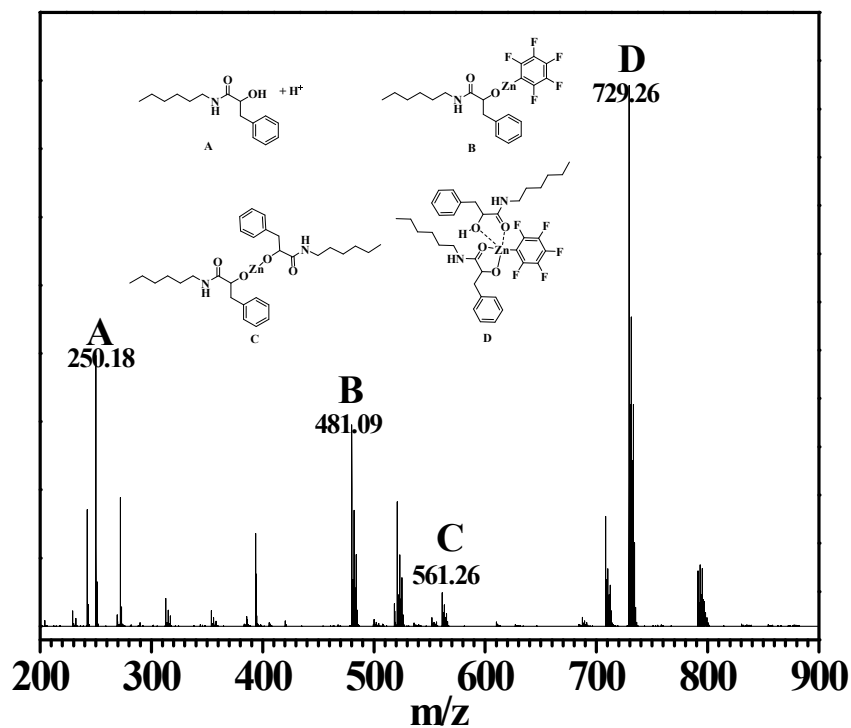

**Figure S20.** Electrospray ionization mass spectrum (ESI-MS) of Comp-1 complexing with  $\text{Zn}(\text{C}_6\text{F}_5)_2$  with molar ratio of 1 to 1.

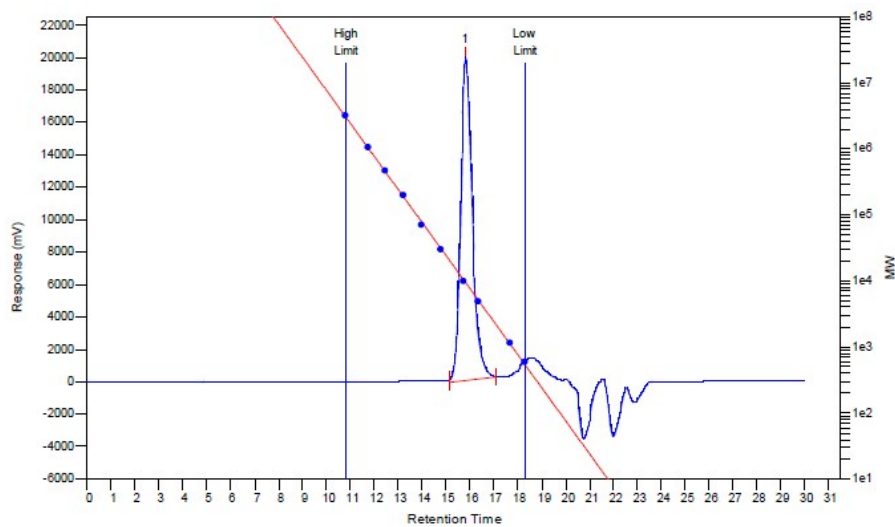

**Figure S21.** GPC curve of the resulting ROP of Phe-OCA in the presence of Comp-1 and  $\text{Zn}(\text{C}_6\text{F}_5)_2$ .  $[\text{Phe-OCA}]:[\text{Zn}(\text{C}_6\text{F}_5)_2]:[\text{Comp-1}] = 50:1:1$ .

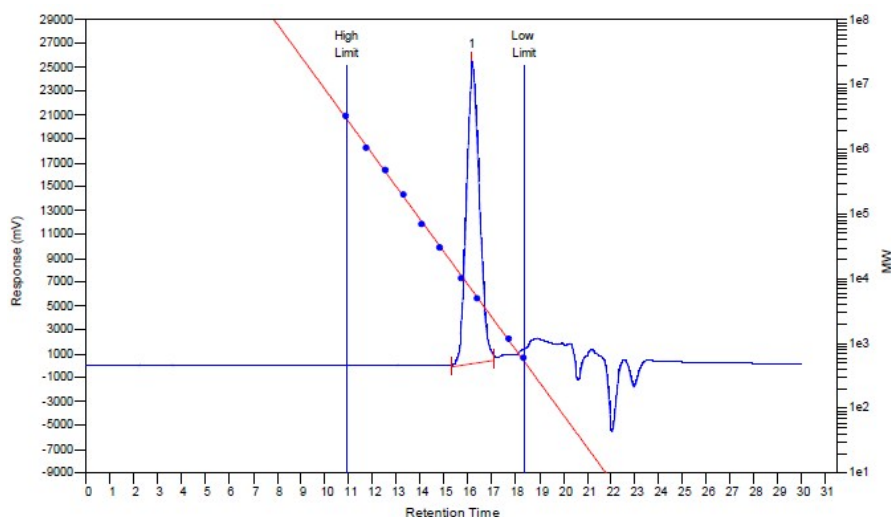

**Figure S22.** GPC curve of Phe-OCA polymerization in the presence of  $\text{Zn}(\text{C}_6\text{F}_5)_2$  and 1-hexyl- $\text{NH}_2$  in THF at 50 °C.  $[\text{Phe-OCA}] = 0.75 \text{ M}$  and  $\text{Phe-OCA}/\text{Zn}(\text{C}_6\text{F}_5)_2/1\text{-hexyl-NH}_2 = 50/0.5/1$ .

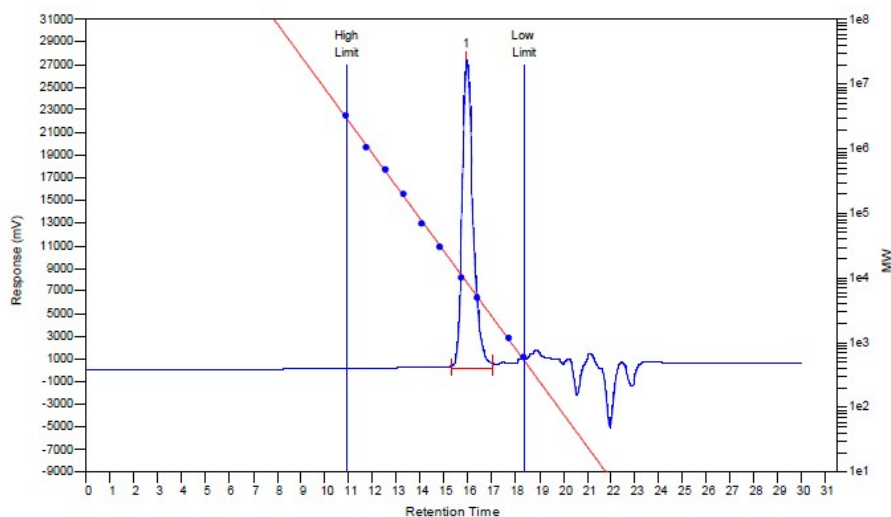

**Figure S23.** GPC curve of Phe-OCA polymerization in the presence of  $\text{Zn}(\text{C}_6\text{F}_5)_2$  and 1-hexyl- $\text{NH}_2$  in THF at 50 °C.  $[\text{Phe-OCA}] = 0.75 \text{ M}$  and  $\text{Phe-OCA}/\text{Zn}(\text{C}_6\text{F}_5)_2/1\text{-hexyl-NH}_2 = 50/1.5/1$ .

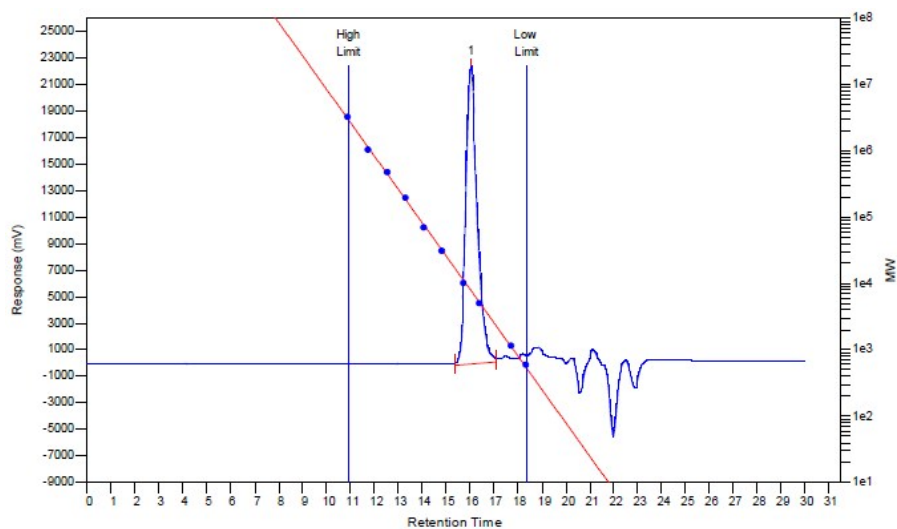

**Figure S24.** GPC curve of Phe-OCA polymerization in the presence of  $\text{Zn}(\text{C}_6\text{F}_5)_2$  and 1-hexyl- $\text{NH}_2$  in THF at 50 °C.  $[\text{Phe-OCA}] = 0.75 \text{ M}$  and  $\text{Phe-OCA}/\text{Zn}(\text{C}_6\text{F}_5)_2/1\text{-hexyl-NH}_2 = 50/2.0/1$ .

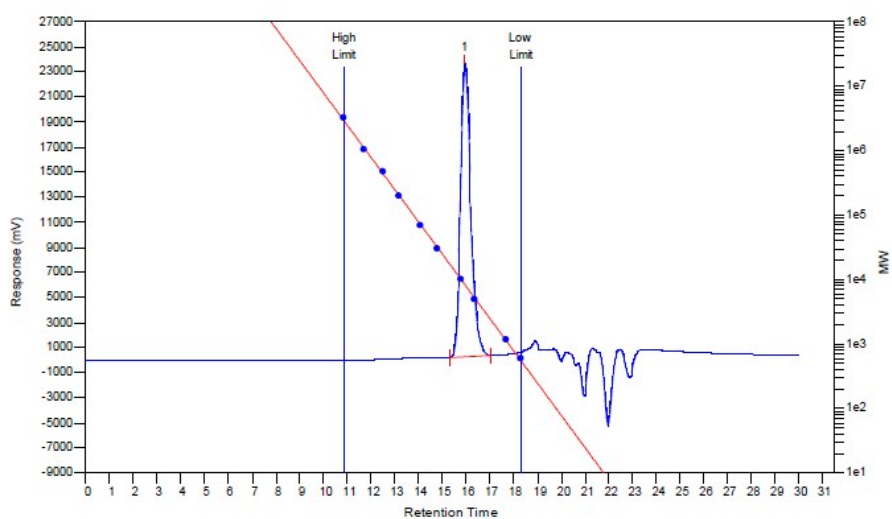

**Figure S25.** GPC curve of Phe-OCA polymerization in the presence of  $\text{Zn}(\text{C}_6\text{F}_5)_2$  and 1-hexyl- $\text{NH}_2$  in THF at 50 °C.  $[\text{Phe-OCA}] = 0.75 \text{ M}$  and  $\text{Phe-OCA}/\text{Zn}(\text{C}_6\text{F}_5)_2/1\text{-hexyl-NH}_2 = 50/5.0/1$ .

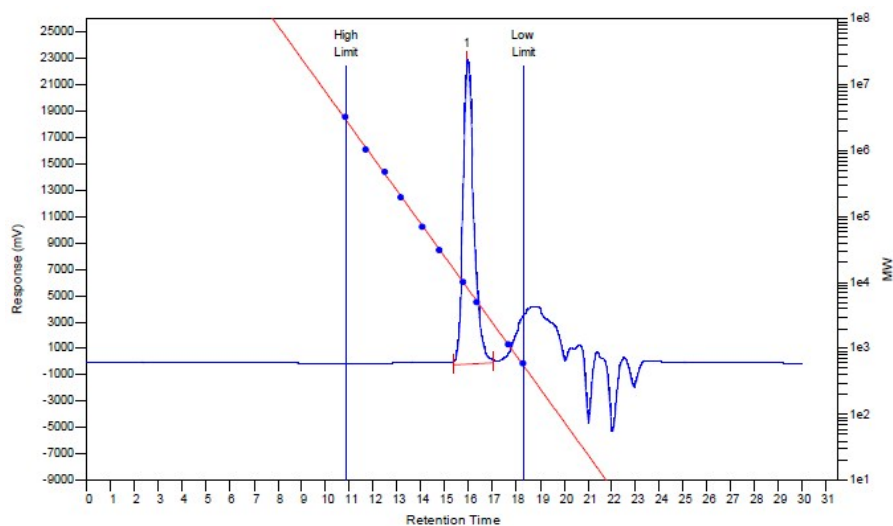

**Figure S26.** GPC curve of Phe-OCA polymerization in the presence of  $\text{Zn}(\text{C}_6\text{F}_5)_2$  and 1-hexyl- $\text{NH}_2$  in THF at 50 °C.  $[\text{Phe-OCA}] = 0.75 \text{ M}$  and  $\text{Phe-OCA}/\text{Zn}(\text{C}_6\text{F}_5)_2/1\text{-hexyl-NH}_2 = 50/10.0/1$ .

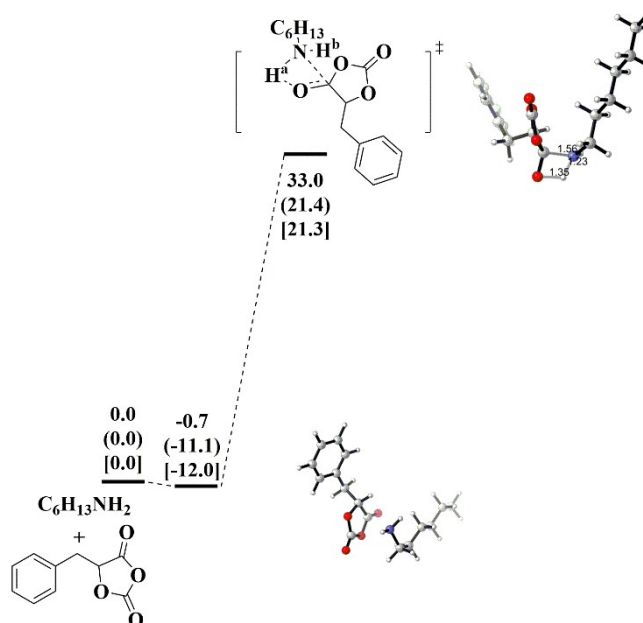

**Figure S27.** Energy profile of 1-hexyl- $\text{NH}_2$  alone nucleophilically attacking Phe-OCA and the corresponding optimized structures.

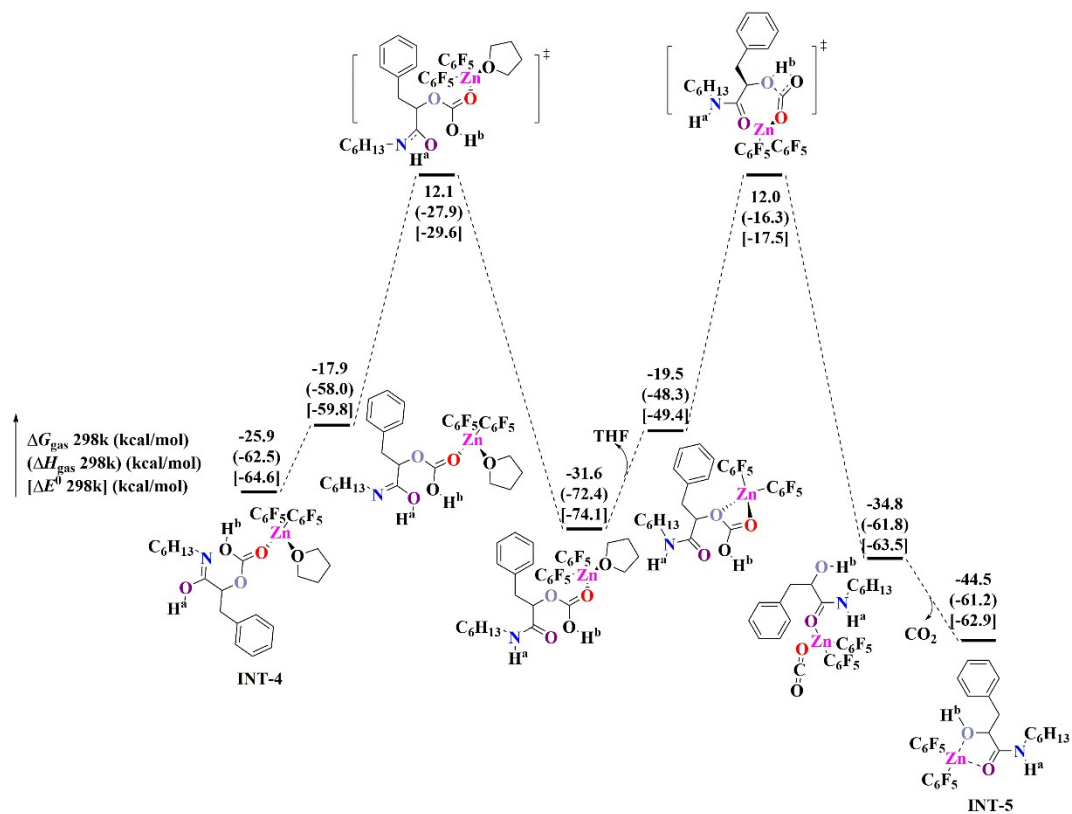

**Figure S28.** DFT computation of acy-oxygen cleavage and decarboxylation.

### Coordinates of All Stationary Points

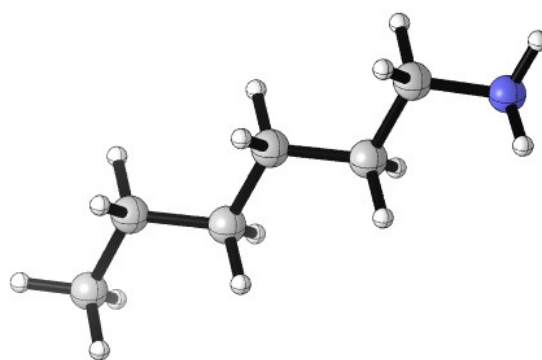

**1-hexyl-NH<sub>2</sub>**

|   |            |             |             |   |            |             |             |
|---|------------|-------------|-------------|---|------------|-------------|-------------|
| C | 3.79095200 | -0.35592200 | -0.05770700 | H | 3.84060600 | -1.02681600 | 0.80395300  |
| H | 3.80596500 | -0.97354900 | -0.95966000 | H | 4.69342900 | 0.25857500  | -0.05696200 |
| C | 2.52701000 | 0.49891700  | -0.00700000 | H | 2.54283300 | 1.12977400  | 0.88842300  |
| H | 2.50769800 | 1.18038400  | -0.86448900 | C | 1.25152300 | -0.34085600 | -0.00507700 |

|               |             |             |               |             |             |
|---------------|-------------|-------------|---------------|-------------|-------------|
| H 1.23545800  | -0.97540300 | -0.89971800 | H 1.26814500  | -1.02200900 | 0.85429000  |
| C -0.02240400 | 0.49935300  | 0.04178700  | H -0.03837900 | 1.17847700  | -0.81931200 |
| H -0.00319300 | 1.13485200  | 0.93558100  | C -1.29342100 | -0.34570800 | 0.05103600  |
| H -1.31612900 | -0.97759400 | -0.84604000 | H -1.29155400 | -1.02308400 | 0.91074000  |
| C -2.56217000 | 0.49503000  | 0.10073400  | H -2.56005200 | 1.19811800  | -0.74596800 |
| H -2.55759400 | 1.09627700  | 1.01495500  | N -3.74395000 | -0.36736800 | 0.13787200  |
| H -4.59290600 | 0.18018700  | 0.21672900  | H -3.81548000 | -0.90415600 | -0.72004400 |

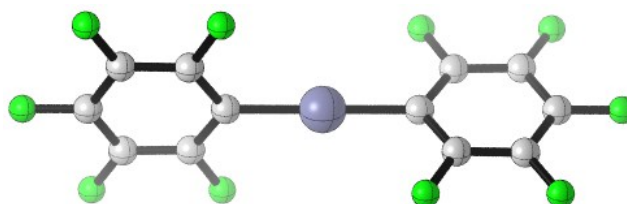

**Zn(C<sub>6</sub>F<sub>5</sub>)<sub>2</sub>**

|               |             |             |               |             |             |
|---------------|-------------|-------------|---------------|-------------|-------------|
| Zn 0.00000000 | -0.00043900 | -0.00125000 | F -2.04967800 | 1.67173900  | 1.65446900  |
| F -4.74915900 | 1.66982900  | 1.65328000  | F -6.09631200 | 0.00088700  | 0.00159800  |
| F -4.75168800 | -1.66865300 | -1.65156000 | F -2.05220500 | -1.67184400 | -1.65554600 |
| F 2.05209200  | 1.67129100  | -1.65632700 | F 4.75155500  | 1.66899400  | -1.65160000 |
| F 6.09630700  | 0.00015400  | 0.00207300  | F 4.74931000  | -1.66916100 | 1.65355600  |
| F 2.04977900  | -1.67193700 | 1.65404600  | C -1.96794500 | -0.00006300 | -0.00061200 |
| C -2.69570700 | 0.83586000  | 0.82726100  | C -4.08056000 | 0.85538900  | 0.84687500  |
| C -4.77285900 | 0.00058200  | 0.00088500  | C -4.08186200 | -0.85456500 | -0.84582900 |
| C -2.69699500 | -0.83568400 | -0.82764700 | C 1.96794700  | -0.00033100 | -0.00122000 |
| C 2.69690600  | 0.83541800  | -0.82820200 | C 4.08177500  | 0.85473300  | -0.84599400 |
| C 4.77285600  | -0.00006100 | 0.00099900  | C 4.08064600  | -0.85505500 | 0.84687800  |
| C 2.69579500  | -0.83597200 | 0.82687000  |               |             |             |

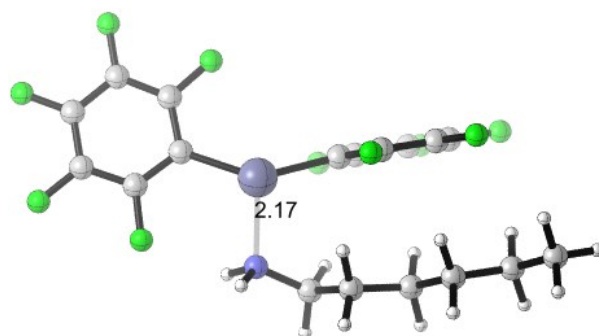

### FLP

|    |             |             |             |   |             |             |             |
|----|-------------|-------------|-------------|---|-------------|-------------|-------------|
| Zn | -0.79889800 | 0.40388400  | -0.25266100 | C | 0.97821400  | -0.62501000 | -0.15604600 |
| C  | 2.01335200  | -0.63681000 | -1.07060000 | F | 1.89070800  | 0.02506600  | -2.24491600 |
| C  | 3.23243000  | -1.26109500 | -0.85356100 | F | 4.20632000  | -1.21769600 | -1.76226800 |
| C  | 3.44320600  | -1.92085900 | 0.34703000  | F | 4.60478800  | -2.51870500 | 0.58559800  |
| C  | 2.43866500  | -1.93984000 | 1.30313800  | F | 2.64427600  | -2.55615700 | 2.46400000  |
| C  | 1.24418800  | -1.29220000 | 1.02531500  | F | 0.31108600  | -1.29582300 | 2.00109300  |
| C  | -2.80266900 | 0.08806400  | -0.08671300 | C | -3.37222900 | -1.12956600 | -0.40559700 |
| F  | -2.58173200 | -2.17965300 | -0.69084100 | C | -4.74036800 | -1.33728900 | -0.48977300 |
| F  | -5.24710100 | -2.52501800 | -0.81452800 | C | -5.59635700 | -0.27358300 | -0.24492500 |
| F  | -6.91152300 | -0.44350600 | -0.32758000 | C | -5.07427100 | 0.96826800  | 0.08075700  |
| F  | -5.89480300 | 1.99622400  | 0.29855900  | C | -3.69782200 | 1.10927700  | 0.15028100  |
| F  | -3.23830000 | 2.35751500  | 0.43406800  | C | 6.67087100  | 1.21967300  | -1.24799000 |
| C  | 5.68207200  | 1.25639600  | -0.08649600 | C | 4.37694900  | 1.95807400  | -0.45438900 |
| C  | 3.36622100  | 1.96663800  | 0.68939900  | C | 2.00287200  | 2.51456000  | 0.27123000  |
| C  | 0.95043900  | 2.34987400  | 1.36311000  | N | -0.40738500 | 2.27588600  | 0.77295200  |
| H  | 6.24069300  | 0.68987800  | -2.10141900 | H | 6.92788800  | 2.23123700  | -1.57373500 |
| H  | 7.59565700  | 0.71157400  | -0.96884300 | H | 5.46060400  | 0.23294200  | 0.23810900  |
| H  | 6.13405900  | 1.76013500  | 0.77508400  | H | 4.59048600  | 2.98716200  | -0.76870400 |
| H  | 3.93469100  | 1.45812900  | -1.32579800 | H | 3.76193400  | 2.54321700  | 1.53376700  |
| H  | 3.23046700  | 0.94010100  | 1.05241000  | H | 2.08656700  | 3.56963400  | -0.01466800 |
| H  | 1.67252600  | 1.97314300  | -0.62119700 | H | 1.01851900  | 3.16332300  | 2.09176600  |
| H  | 1.11678900  | 1.41225600  | 1.89952500  | H | -1.12482600 | 2.33530000  | 1.49261900  |
| H  | -0.57546800 | 3.07657600  | 0.16654900  |   |             |             |             |

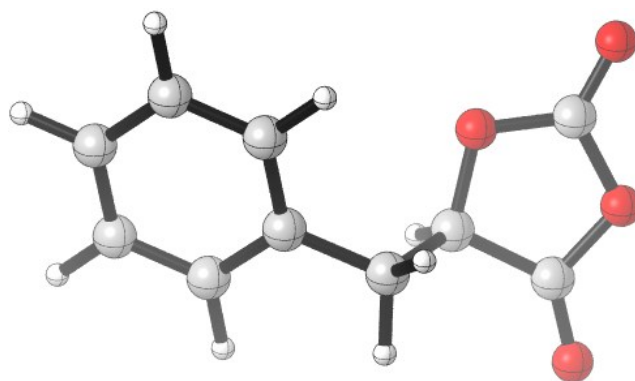

**Phe-OCA**

|   |             |             |             |   |             |             |             |
|---|-------------|-------------|-------------|---|-------------|-------------|-------------|
| C | -0.07365400 | -0.86540300 | 0.74903400  | H | 0.26969000  | -0.43098500 | 1.69266100  |
| H | -0.05932700 | -1.95267000 | 0.86002900  | C | 0.93690300  | -0.51374200 | -0.33860800 |
| H | 0.59080200  | -0.85223100 | -1.31842100 | O | 3.16887400  | -0.01519000 | 0.01801900  |
| C | 2.47741600  | 1.15919600  | -0.19078000 | C | 2.31208600  | -1.07978100 | -0.05086900 |
| O | 2.63870000  | -2.20428400 | 0.11205400  | O | 2.97507700  | 2.22522800  | -0.17788500 |
| O | 1.17826900  | 0.89264400  | -0.40147300 | C | -1.45950000 | -0.38076700 | 0.40337200  |
| C | -1.82988900 | 0.94211000  | 0.64533300  | C | -2.37583600 | -1.24293700 | -0.19788400 |
| C | -3.09678200 | 1.39327700  | 0.29349600  | H | -1.12035300 | 1.62115700  | 1.10564500  |
| C | -3.64357900 | -0.79292900 | -0.55084500 | H | -2.09939500 | -2.27630000 | -0.38320100 |
| C | -4.00594800 | 0.52715600  | -0.30572700 | H | -3.37367000 | 2.42257700  | 0.48810300  |
| H | -4.34866900 | -1.47461000 | -1.01153300 | H | -4.99373400 | 0.87879000  | -0.57812400 |

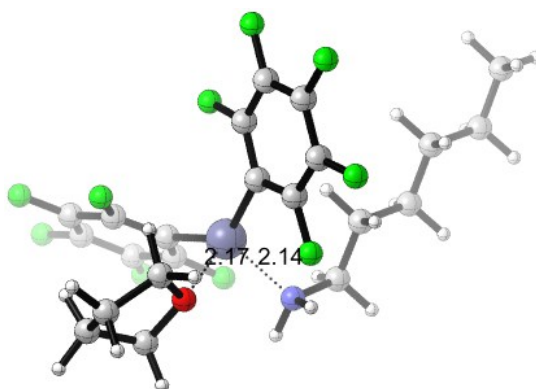

**INT-1**

|    |             |             |             |   |            |             |             |
|----|-------------|-------------|-------------|---|------------|-------------|-------------|
| Zn | -0.39543700 | -0.14341900 | -0.59919000 | C | 1.23820700 | -1.08333200 | 0.21392300  |
| C  | 2.17300500  | -1.69031800 | -0.59913500 | F | 2.00636900 | -1.65276500 | -1.94889200 |



|               |             |             |               |             |             |
|---------------|-------------|-------------|---------------|-------------|-------------|
| C 3.30007700  | -2.34850100 | -0.13531400 | F 4.17123300  | -2.92173200 | -0.96572100 |
| C 3.51363300  | -2.40514300 | 1.23375400  | F 4.58337700  | -3.02941600 | 1.71538500  |
| C 2.60794800  | -1.80770100 | 2.09726000  | F 2.82084200  | -1.86579700 | 3.41015300  |
| C 1.49744700  | -1.16434200 | 1.56853400  | F 0.65425000  | -0.59492000 | 2.44697000  |
| C -2.11331700 | 0.66649200  | 0.17464800  | C -2.88280600 | -0.09963200 | 1.02848800  |
| F -2.47065900 | -1.34507600 | 1.35539800  | C -4.08664600 | 0.32149800  | 1.57126800  |
| F -4.79483700 | -0.45461200 | 2.38945400  | C -4.55891100 | 1.58354600  | 1.24206900  |
| F -5.70919200 | 2.01642200  | 1.74646500  | C -3.82995100 | 2.38870800  | 0.38044000  |
| F -4.29183600 | 3.59582000  | 0.05833800  | C -2.63357800 | 1.90625900  | -0.12941800 |
| F -1.96901400 | 2.72148500  | -0.98323300 | C -1.04009500 | -3.10908600 | -1.19048500 |
| O -1.26770600 | -1.77991900 | -1.72889100 | C -2.60551400 | -1.68392400 | -2.25956800 |
| C -3.36303200 | -2.83281200 | -1.61377600 | C -2.27986000 | -3.91431200 | -1.56522000 |
| H -0.11224700 | -3.48945400 | -1.61850800 | H -0.93115200 | -3.01690400 | -0.10726700 |
| H -2.99693100 | -0.69671800 | -2.00927400 | H -2.55353500 | -1.79742400 | -3.34717600 |
| H -3.66894700 | -2.55488600 | -0.60243600 | H -4.24353600 | -3.12464400 | -2.18560800 |
| H -2.48595200 | -4.69928200 | -0.83851100 | H -2.15854200 | -4.37389800 | -2.54926600 |
| C 6.02380400  | 4.25714500  | 1.06213400  | C 4.92735500  | 4.38873300  | 0.00788600  |
| C 4.05282900  | 3.14054900  | -0.08266300 | C 2.94665700  | 3.25794900  | -1.12901200 |
| C 2.09569300  | 1.99439700  | -1.22114600 | C 0.96378500  | 2.13418600  | -2.22831700 |
| N 0.23218000  | 0.85177000  | -2.38833400 | H 5.59254600  | 4.09398100  | 2.05314900  |
| H 6.67658700  | 3.40906600  | 0.83998800  | H 6.64379700  | 5.15439800  | 1.10947300  |
| H 4.29680600  | 5.25449300  | 0.23751100  | H 5.37802900  | 4.58412700  | -0.97134600 |
| H 4.68187600  | 2.27303600  | -0.31634500 | H 3.60416900  | 2.94041100  | 0.89770500  |
| H 3.39322400  | 3.47089800  | -2.10771000 | H 2.30560800  | 4.11359900  | -0.88579700 |
| H 2.72871900  | 1.14118000  | -1.49537700 | H 1.67879900  | 1.76391300  | -0.23377200 |
| H 1.35872000  | 2.47020000  | -3.19303900 | H 0.24357800  | 2.87753000  | -1.88253800 |
| H -0.56975200 | 0.99133300  | -2.99813000 | H 0.83244200  | 0.16774600  | -2.84749200 |

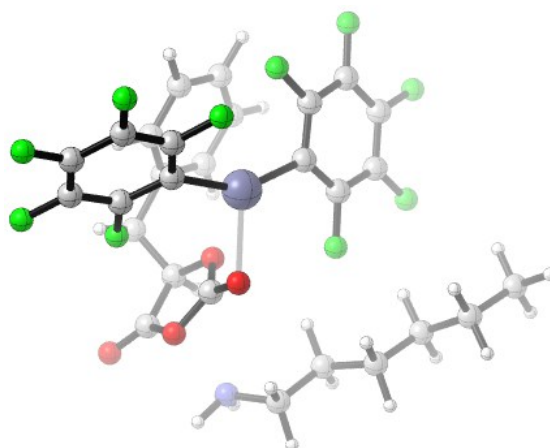

### INT-2

|    |             |             |             |   |             |             |             |
|----|-------------|-------------|-------------|---|-------------|-------------|-------------|
| Zn | 0.71130900  | 0.50289400  | -0.85609100 | C | -0.90340800 | 1.56261300  | -0.47173800 |
| C  | -2.18711000 | 1.05547700  | -0.37584000 | F | -2.42915500 | -0.22432000 | -0.71903000 |
| C  | -3.26997400 | 1.80039300  | 0.07199100  | F | -4.49602200 | 1.27499700  | 0.15610000  |
| C  | -3.06946400 | 3.12246100  | 0.44759500  | F | -4.08876600 | 3.84953200  | 0.89473900  |
| C  | -1.79986700 | 3.67588100  | 0.36469900  | F | -1.59322200 | 4.93134400  | 0.76580600  |
| C  | -0.75575900 | 2.88653700  | -0.09693500 | F | 0.45949000  | 3.45978700  | -0.13114100 |
| C  | 2.68636900  | 0.34209600  | -0.92360400 | C | 3.45055700  | 1.19583900  | -1.69956900 |
| F  | 2.85110100  | 2.17073200  | -2.40294500 | C | 4.83385000  | 1.10693300  | -1.80202300 |
| F  | 5.52783800  | 1.95256900  | -2.55981500 | C | 5.49645000  | 0.10933700  | -1.09836200 |
| F  | 6.81836400  | 0.00129700  | -1.17966200 | C | 4.77443300  | -0.77809300 | -0.30942600 |
| F  | 5.40585700  | -1.73432700 | 0.36956000  | C | 3.39639000  | -0.63426100 | -0.25321900 |
| F  | 2.72903800  | -1.52708300 | 0.53096100  | C | 0.90905700  | -1.58901000 | 2.93391800  |
| C  | 0.02631200  | -2.28947900 | 1.89320800  | O | 0.69705400  | -3.35689800 | -0.07960900 |
| C  | 0.28283400  | -2.11923300 | -0.35540700 | C | 0.62679400  | -3.55380400 | 1.30988400  |
| O  | 1.05900900  | -4.51849800 | 1.83908400  | O | 0.31269300  | -1.59023300 | -1.44184600 |
| O  | -0.13424200 | -1.47103100 | 0.72605300  | C | 0.62535200  | -0.10357900 | 2.95199900  |
| C  | 1.59055700  | 0.79174600  | 2.48667400  | C | -0.61705200 | 0.39018900  | 3.35685300  |
| C  | 1.32753400  | 2.15973400  | 2.44071400  | C | -0.88589300 | 1.75463500  | 3.30288200  |
| C  | 0.08701600  | 2.64300100  | 2.84679200  | H | 1.96175800  | -1.76319400 | 2.70268300  |
| H  | 0.70221000  | -2.05531700 | 3.90255700  | H | -0.97349900 | -2.51398600 | 2.26976500  |
| H  | 2.55852600  | 0.41514100  | 2.16793000  | H | -1.38062500 | -0.29581800 | 3.71776600  |

|               |             |             |               |             |             |
|---------------|-------------|-------------|---------------|-------------|-------------|
| H 2.08406000  | 2.84314200  | 2.06893200  | H -1.85637000 | 2.12600700  | 3.61815300  |
| H -0.12927200 | 3.70599500  | 2.78653700  | C -6.63450300 | 0.23301000  | -2.36816900 |
| C -5.48342800 | -0.73383100 | -2.63356400 | C -5.14646100 | -1.58816100 | -1.41437200 |
| C -4.01398900 | -2.58067100 | -1.67079700 | C -3.46254200 | -3.17317600 | -0.37749000 |
| C -2.40884200 | -4.24448000 | -0.61443800 | N -1.75671100 | -4.60283900 | 0.65243600  |
| H -7.54634900 | -0.31005700 | -2.09695600 | H -6.38601700 | 0.90385200  | -1.53997200 |
| H -6.85803800 | 0.84578900  | -3.24632300 | H -5.72746100 | -1.38388300 | -3.48412400 |
| H -4.58672600 | -0.16930700 | -2.92191400 | H -4.86158600 | -0.92586200 | -0.58933600 |
| H -6.04280600 | -2.13210500 | -1.08448200 | H -3.19663800 | -2.07267600 | -2.19907200 |
| H -4.36477900 | -3.38320700 | -2.33440500 | H -3.02042600 | -2.36786500 | 0.22326200  |
| H -4.28404600 | -3.59882300 | 0.21775500  | H -1.63724500 | -3.86021400 | -1.29449300 |
| H -2.86892100 | -5.10706200 | -1.12010500 | H -2.46932100 | -4.90963600 | 1.31397100  |
| H -1.14682200 | -5.40796800 | 0.51340600  |               |             |             |

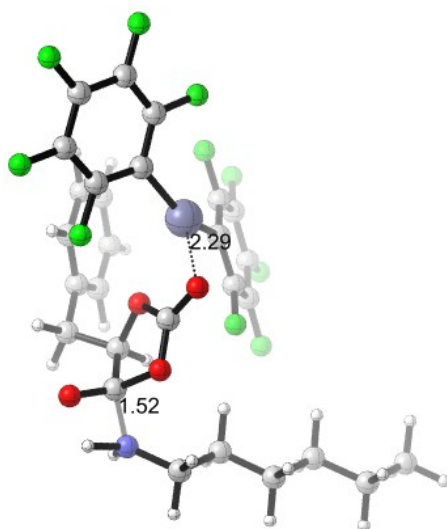

**TS-1**

|               |             |             |               |            |             |
|---------------|-------------|-------------|---------------|------------|-------------|
| Zn 1.15129500 | 0.22359800  | -0.92971600 | C -0.24919200 | 1.63960500 | -0.66188600 |
| C -1.59632600 | 1.37610900  | -0.49300500 | F -2.08426300 | 0.13342400 | -0.75007500 |
| C -2.52580600 | 2.31047500  | -0.05896600 | F -3.81362300 | 1.98406500 | 0.10462300  |
| C -2.09456900 | 3.60177700  | 0.21439400  | F -2.95872300 | 4.52022700 | 0.64469100  |
| C -0.75501300 | 3.92607000  | 0.04726800  | F -0.33393100 | 5.15768900 | 0.34274400  |
| C 0.12917200  | 2.94306500  | -0.38151200 | F 1.42170700  | 3.29852500 | -0.49123800 |
| C 3.07467300  | -0.31834300 | -0.93384600 | C 4.04991200  | 0.42496400 | -1.57850500 |

|               |             |             |               |             |             |
|---------------|-------------|-------------|---------------|-------------|-------------|
| F 3.70535600  | 1.54805400  | -2.23684800 | C 5.39424200  | 0.07310200  | -1.59590200 |
| F 6.30016500  | 0.81716400  | -2.23276800 | C 5.79378100  | -1.08052100 | -0.93271700 |
| F 7.07572900  | -1.43991600 | -0.93279400 | C 4.85270700  | -1.85952700 | -0.27031600 |
| F 5.23911900  | -2.96603200 | 0.36782100  | C 3.52275200  | -1.45926600 | -0.28888800 |
| F 2.64207700  | -2.24181500 | 0.37304500  | C -0.32163600 | -1.25012300 | 2.96136700  |
| C -1.02801900 | -1.51442800 | 1.64608400  | O -1.19034200 | -2.97864200 | -0.16851800 |
| C -0.37384100 | -1.99350700 | -0.47382300 | C -1.37178400 | -2.98536500 | 1.32282800  |
| O -0.73827800 | -3.94506600 | 1.93811600  | O 0.12392500  | -1.73040700 | -1.54745200 |
| O -0.11609000 | -1.21163700 | 0.58294800  | C 0.24567700  | 0.15281100  | 2.92454900  |
| C 1.56414100  | 0.35872400  | 2.50630800  | C -0.55973800 | 1.26150700  | 3.19549600  |
| C 2.07072800  | 1.65049200  | 2.36955400  | C -0.05278300 | 2.55460200  | 3.06817200  |
| C 1.26385700  | 2.75135700  | 2.65502700  | H 0.46167800  | -2.00308100 | 3.08584600  |
| H -1.03921600 | -1.36918200 | 3.78104100  | H -1.90287200 | -0.86198300 | 1.51410000  |
| H 2.19012000  | -0.50046600 | 2.27577400  | H -1.58995200 | 1.11597700  | 3.51598100  |
| H 3.09257300  | 1.79635000  | 2.03189100  | H -0.68685200 | 3.40856300  | 3.28935200  |
| H 1.65464600  | 3.75771900  | 2.53992100  | C -7.40859500 | 0.44130700  | -3.00060900 |
| C -6.91676300 | -0.94017400 | -2.57459400 | C -5.86768100 | -0.87115300 | -1.46678900 |
| C -5.36873500 | -2.24809400 | -1.03197500 | C -4.31313500 | -2.16355400 | 0.06937800  |
| C -3.80341200 | -3.53749800 | 0.47929600  | N -2.79097600 | -3.46759400 | 1.55962500  |
| H -7.86097000 | 0.97213500  | -2.15655500 | H -6.58000800 | 1.05306900  | -3.37169900 |
| H -8.15748200 | 0.37240500  | -3.79421100 | H -7.76607600 | -1.54562100 | -2.23201800 |
| H -6.49214200 | -1.46471100 | -3.44020100 | H -5.01475700 | -0.26823200 | -1.80623000 |
| H -6.28851600 | -0.34398400 | -0.59904500 | H -4.94333200 | -2.77095400 | -1.89910100 |
| H -6.21756800 | -2.85420100 | -0.68579500 | H -3.47531300 | -1.55326100 | -0.28241200 |
| H -4.73887900 | -1.65184100 | 0.94532900  | H -3.34130500 | -4.05696900 | -0.36230500 |
| H -4.61659900 | -4.16294300 | 0.86070700  | H -3.17172400 | -2.98952800 | 2.37968700  |
| H -2.02135500 | -4.35695400 | 1.94216000  |               |             |             |

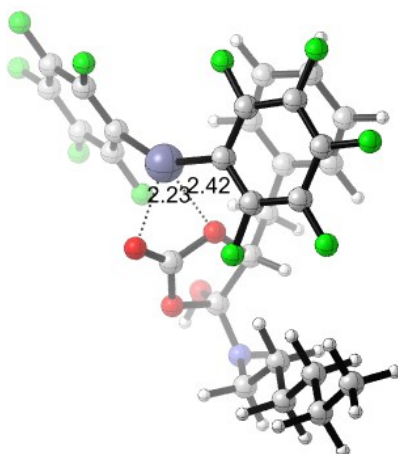

### INT-3

|    |             |             |             |   |             |             |             |
|----|-------------|-------------|-------------|---|-------------|-------------|-------------|
| Zn | 0.97352700  | 0.53920400  | -0.98266400 | C | -0.56965600 | 1.74922900  | -0.72372600 |
| C  | -1.89080500 | 1.34330300  | -0.79376200 | F | -2.19395400 | 0.11114100  | -1.26158600 |
| C  | -2.96119900 | 2.13543500  | -0.40040500 | F | -4.22300900 | 1.70310400  | -0.49062200 |
| C  | -2.70586000 | 3.40572000  | 0.10074300  | F | -3.71249500 | 4.17846600  | 0.50108000  |
| C  | -1.39774800 | 3.85993900  | 0.18884300  | F | -1.14364300 | 5.06267200  | 0.70730600  |
| C  | -0.36965300 | 3.02757500  | -0.23386900 | F | 0.87919900  | 3.51057600  | -0.11181300 |
| C  | 2.90536700  | 0.10885600  | -0.84127500 | C | 3.88875100  | 0.92960300  | -1.36449400 |
| F  | 3.54572700  | 2.07402100  | -1.97921700 | C | 5.24726900  | 0.64416800  | -1.28940300 |
| F  | 6.16006600  | 1.46774200  | -1.80199100 | C | 5.65214400  | -0.52936200 | -0.66775500 |
| F  | 6.94549200  | -0.82566500 | -0.57801400 | C | 4.70328100  | -1.39299000 | -0.13455800 |
| F  | 5.09005000  | -2.51961900 | 0.46408400  | C | 3.36314300  | -1.05077500 | -0.24158300 |
| F  | 2.47699400  | -1.92202700 | 0.30481500  | C | 0.27435500  | -1.60964900 | 2.60849300  |
| C  | -0.59615900 | -1.96136000 | 1.40828600  | O | -0.29328900 | -3.19159400 | -0.57841500 |
| C  | -0.01994900 | -1.92048500 | -0.80152600 | C | -0.50412000 | -3.41664700 | 0.84697300  |
| O  | 0.59387500  | -4.01789100 | 1.39917900  | O | 0.33982100  | -1.41901700 | -1.84228500 |
| O  | -0.17396800 | -1.16920700 | 0.28766300  | C | 0.33602300  | -0.10392600 | 2.74108100  |
| C  | 1.49842900  | 0.57281500  | 2.36549700  | C | -0.78265700 | 0.63768100  | 3.12654500  |
| C  | 1.54497100  | 1.96495700  | 2.37262600  | C | -0.74038000 | 2.02962900  | 3.13229700  |
| C  | 0.42254800  | 2.69662500  | 2.75267200  | H | 1.27285300  | -2.02507900 | 2.46384600  |
| H  | -0.16189500 | -2.07951100 | 3.49749800  | H | -1.63893500 | -1.69893600 | 1.59955200  |
| H  | 2.37181200  | 0.00041200  | 2.06477000  | H | -1.69668300 | 0.12494500  | 3.42044500  |

|               |             |             |               |             |             |
|---------------|-------------|-------------|---------------|-------------|-------------|
| H 2.44967800  | 2.47693900  | 2.05978300  | H -1.61965300 | 2.59594800  | 3.42482000  |
| H 0.44423400  | 3.78207000  | 2.72488200  | C -7.21488200 | 0.13546100  | -1.76766900 |
| C -6.60480200 | -1.26377200 | -1.74294300 | C -5.37601900 | -1.33450200 | -0.84051400 |
| C -4.73156500 | -2.71740800 | -0.79299600 | C -3.49649800 | -2.74254700 | 0.10596000  |
| C -2.78721000 | -4.09560400 | 0.06264800  | N -1.63276900 | -4.28609200 | 0.94788500  |
| H -7.54701600 | 0.43260800  | -0.76720300 | H -6.47762900 | 0.87320400  | -2.10099500 |
| H -8.07742600 | 0.18840200  | -2.43812700 | H -7.35319200 | -1.99152100 | -1.40260400 |
| H -6.32232800 | -1.56357200 | -2.76038700 | H -4.63137500 | -0.60740600 | -1.18388900 |
| H -5.65572700 | -1.02582700 | 0.17718000  | H -4.44351500 | -3.01897300 | -1.80956900 |
| H -5.46019800 | -3.46143300 | -0.44211800 | H -2.81971500 | -1.94265000 | -0.22153100 |
| H -3.79198200 | -2.50864700 | 1.13951000  | H -2.45340500 | -4.30133100 | -0.95829200 |
| H -3.49568200 | -4.88863000 | 0.32454900  | H -1.89929900 | -4.37490000 | 1.92464600  |
| H 0.55661000  | -4.95340500 | 1.13533500  |               |             |             |

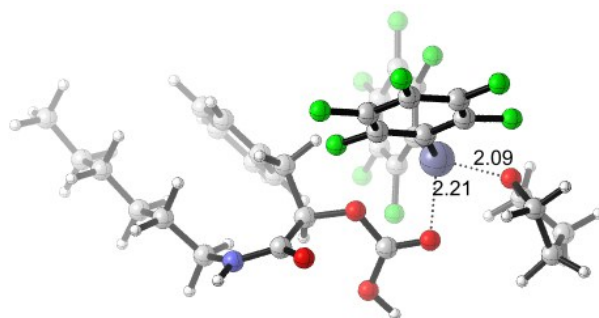

**INT-4**

|               |             |             |               |             |             |
|---------------|-------------|-------------|---------------|-------------|-------------|
| Zn 2.30650100 | 0.53380100  | -0.05709700 | C 0.95814000  | 1.93525700  | 0.54376600  |
| C 0.00620500  | 2.57053700  | -0.23192500 | F -0.03897400 | 2.36670700  | -1.57885400 |
| C -0.96292300 | 3.43316500  | 0.26231700  | F -1.86563300 | 4.00001200  | -0.54699000 |
| C -1.00929900 | 3.67481500  | 1.62710500  | F -1.94195200 | 4.47884800  | 2.13193300  |
| C -0.07467300 | 3.07211600  | 2.45831900  | F -0.11204300 | 3.30585500  | 3.77002900  |
| C 0.87721100  | 2.22884000  | 1.89548200  | F 1.75564600  | 1.66679400  | 2.74712800  |
| C 2.88827200  | -1.26096700 | 0.65000400  | C 4.19334900  | -1.49135300 | 1.05023000  |
| F 5.10602700  | -0.49848400 | 0.96396000  | C 4.65537300  | -2.69928800 | 1.55748300  |
| F 5.92920000  | -2.86118700 | 1.92227400  | C 3.76003400  | -3.75132400 | 1.68778600  |
| F 4.16690300  | -4.92213800 | 2.17524000  | C 2.43514300  | -3.57413600 | 1.31469700  |

|               |             |             |               |             |             |
|---------------|-------------|-------------|---------------|-------------|-------------|
| F 1.56943900  | -4.58048800 | 1.45270800  | C 2.03663200  | -2.34168300 | 0.81210500  |
| F 0.72852400  | -2.23662700 | 0.49750700  | C 4.95336100  | 0.94805300  | -1.49423500 |
| O 3.96842200  | 1.63354900  | -0.68629700 | C 3.64359900  | 2.91422600  | -1.26626300 |
| C 4.74050200  | 3.17029100  | -2.29108300 | C 5.03320900  | 1.75096400  | -2.78536900 |
| H 5.89588200  | 0.94802900  | -0.94086800 | H 4.61926000  | -0.08315400 | -1.63186300 |
| H 2.65737900  | 2.83982200  | -1.73977900 | H 3.59901400  | 3.64364700  | -0.45515400 |
| H 4.41654600  | 3.84998900  | -3.08204800 | H 5.62495500  | 3.59610200  | -1.80649800 |
| H 4.25085700  | 1.42224800  | -3.47627000 | H 6.00405900  | 1.65167700  | -3.27533300 |
| C -1.71924800 | -0.75375700 | -0.02554000 | C -1.18804000 | -0.70422500 | -1.47047300 |
| O 0.25790000  | 0.03718100  | -3.55295000 | C 0.89695800  | 0.01837100  | -2.39694900 |
| C -1.23269900 | -2.05739600 | -2.20634500 | O -0.20484300 | -2.64891000 | -2.47350000 |
| O 2.06526000  | 0.34982400  | -2.24557200 | O 0.18789600  | -0.33379100 | -1.35774400 |
| C -2.94755300 | 0.07780100  | 0.27627700  | C -3.19687600 | 1.30171900  | -0.34951300 |
| C -3.81970500 | -0.34517100 | 1.28357100  | C -4.29465800 | 2.07905500  | 0.01597800  |
| C -4.91762400 | 0.42706800  | 1.65162900  | C -5.16171100 | 1.64165800  | 1.01361200  |
| H -0.89667000 | -0.39800100 | 0.60561500  | H -1.88873100 | -1.79440500 | 0.26994300  |
| H -1.68933200 | 0.06447800  | -2.06536200 | H -2.51798100 | 1.68104400  | -1.10951200 |
| H -3.63092600 | -1.29027600 | 1.78824300  | H -4.45620000 | 3.03481000  | -0.47188200 |
| H -5.58507900 | 0.07762600  | 2.43462100  | H -6.01673700 | 2.24640900  | 1.29891800  |
| C -8.76489900 | -1.67827600 | 1.56398600  | C -7.95701100 | -1.22263200 | 0.35229400  |
| C -6.75431100 | -2.12237500 | 0.07772700  | C -5.90596400 | -1.63582100 | -1.09322700 |
| C -4.64430600 | -2.47108600 | -1.29845200 | C -3.75280900 | -1.86770000 | -2.37918400 |
| N -2.46488500 | -2.52807500 | -2.52411100 | H -9.14358200 | -2.69613200 | 1.42265500  |
| H -8.14426600 | -1.67949400 | 2.46697000  | H -9.62185700 | -1.02379100 | 1.74730600  |
| H -8.60063600 | -1.19477000 | -0.53642000 | H -7.59935800 | -0.19580700 | 0.50701700  |
| H -6.12519800 | -2.16597900 | 0.97830200  | H -7.09592600 | -3.15021900 | -0.10947300 |
| H -5.61587700 | -0.59018800 | -0.91273500 | H -6.50900400 | -1.63931400 | -2.01217500 |
| H -4.07848600 | -2.52046100 | -0.36012800 | H -4.90434600 | -3.50446500 | -1.56309400 |
| H -3.58483700 | -0.81203400 | -2.14829700 | H -4.26816200 | -1.89149900 | -3.34731200 |
| H -2.43988300 | -3.43336800 | -2.97786500 | H 0.89090100  | 0.31307400  | -4.23661600 |

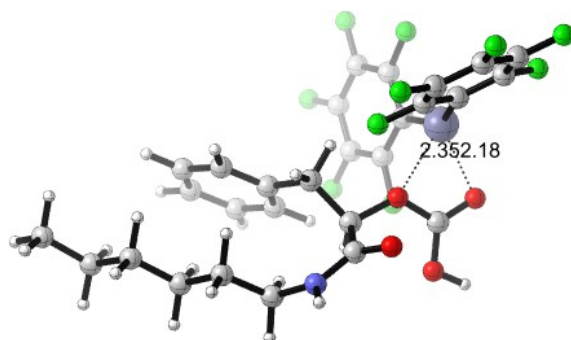

|    |             |             |             |   |             |             |             |
|----|-------------|-------------|-------------|---|-------------|-------------|-------------|
| Zn | -2.32253400 | 0.94621500  | 0.46400500  | C | -1.05029600 | 2.46504400  | 0.21837300  |
| C  | 0.06285300  | 2.70162000  | 1.00592500  | F | 0.26740100  | 1.99578600  | 2.15014700  |
| C  | 1.04810200  | 3.63188100  | 0.70719100  | F | 2.11596000  | 3.78064900  | 1.49651400  |
| C  | 0.91954100  | 4.39457000  | -0.44454100 | F | 1.84725700  | 5.29281000  | -0.75824000 |
| C  | -0.18606200 | 4.21342100  | -1.26547200 | F | -0.31323300 | 4.94363800  | -2.37118400 |
| C  | -1.13174500 | 3.25607100  | -0.91733500 | F | -2.16558900 | 3.09895000  | -1.76047000 |
| C  | -3.45454800 | -0.45173300 | -0.35899600 | C | -4.83622200 | -0.40197300 | -0.35052900 |
| F  | -5.45855000 | 0.66698800  | 0.18093900  | C | -5.64214300 | -1.41164600 | -0.85916000 |
| F  | -6.97196000 | -1.32434800 | -0.82864200 | C | -5.03684000 | -2.53520200 | -1.40739600 |
| F  | -5.78424100 | -3.51892700 | -1.90158900 | C | -3.65187800 | -2.63195700 | -1.43954100 |
| F  | -3.07462400 | -3.70967200 | -1.97216500 | C | -2.89900700 | -1.58975100 | -0.91607200 |
| F  | -1.55698600 | -1.72210900 | -0.97983800 | C | 1.11867300  | -0.75276100 | -0.16606800 |
| C  | 0.66980800  | -0.98925900 | 1.28812400  | O | -0.52664800 | -0.57223600 | 3.61929800  |
| C  | -1.20123800 | -0.16734000 | 2.56469400  | C | 0.52106000  | -2.47575500 | 1.66349600  |
| O  | -0.58195500 | -2.95986600 | 1.82652600  | O | -2.26016300 | 0.43895300  | 2.58667300  |
| O  | -0.63831900 | -0.40781000 | 1.39708400  | C | 2.45719300  | -0.07092400 | -0.36215400 |
| C  | 2.92047200  | 0.93452600  | 0.49105800  | C | 3.21657800  | -0.38848800 | -1.49206900 |
| C  | 4.11873900  | 1.59560000  | 0.22745700  | C | 4.41329700  | 0.27026700  | -1.75932100 |
| C  | 4.87180900  | 1.26255400  | -0.89552200 | H | 0.34528300  | -0.12790100 | -0.62817600 |
| H  | 1.09686900  | -1.69941500 | -0.71583300 | H | 1.31327300  | -0.47077500 | 2.00348800  |
| H  | 2.34090200  | 1.23570900  | 1.35976700  | H | 2.86124100  | -1.15845100 | -2.17346600 |
| H  | 4.44940800  | 2.38314700  | 0.89693100  | H | 4.98964400  | 0.00500200  | -2.64127900 |
| H  | 5.80460000  | 1.77804600  | -1.10131900 | C | 7.88853100  | -2.34162800 | -2.42445000 |
| C  | 7.20820200  | -2.06625400 | -1.08658800 | C | 5.87887000  | -2.80363800 | -0.94328900 |



|   |             |             |             |   |            |             |             |
|---|-------------|-------------|-------------|---|------------|-------------|-------------|
| C | 5.16137800  | -2.48601900 | 0.36507200  | C | 3.79018100 | -3.15111000 | 0.46233900  |
| C | 3.04362000  | -2.70011800 | 1.71366700  | N | 1.67220600 | -3.18048500 | 1.78773200  |
| H | 8.08503300  | -3.41159800 | -2.55093300 | H | 7.25251600 | -2.02273900 | -3.25783700 |
| H | 8.84220400  | -1.81298500 | -2.50894700 | H | 7.87400600 | -2.35488300 | -0.26303400 |
| H | 7.02795700  | -0.98863000 | -0.97402400 | H | 5.22377900 | -2.53100000 | -1.78321400 |
| H | 6.04649800  | -3.88691100 | -1.02332200 | H | 5.03608200 | -1.39644400 | 0.44826200  |
| H | 5.78674200  | -2.79545800 | 1.21423200  | H | 3.19169800 | -2.89143700 | -0.41936300 |
| H | 3.89189000  | -4.24436500 | 0.46252500  | H | 3.03863600 | -1.60671600 | 1.74726600  |
| H | 3.57888200  | -3.03171400 | 2.61166000  | H | 1.51891500 | -4.15900600 | 2.00070900  |
| H | -1.03126000 | -0.32073100 | 4.41237900  |   |            |             |             |

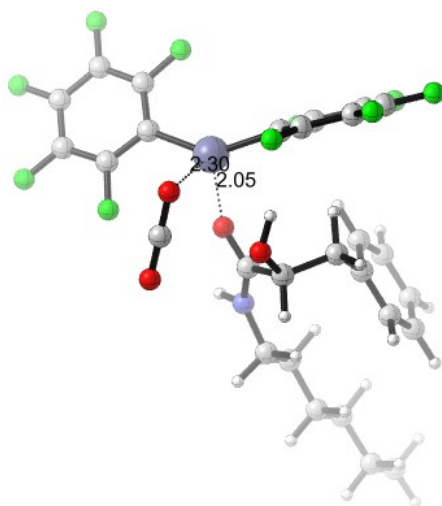

|    |             |             |             |   |             |             |             |
|----|-------------|-------------|-------------|---|-------------|-------------|-------------|
| Zn | -1.95059400 | 0.24777500  | 0.28750900  | C | -3.34720200 | -1.03201200 | -0.32418800 |
| C  | -3.45765100 | -2.28977000 | 0.23964300  | F | -2.60356500 | -2.66291700 | 1.22318400  |
| C  | -4.40633900 | -3.22941200 | -0.13942900 | F | -4.46886200 | -4.43165700 | 0.43579300  |
| C  | -5.30336500 | -2.89552600 | -1.14574200 | F | -6.22793100 | -3.77167500 | -1.53167800 |
| C  | -5.23643100 | -1.64528200 | -1.74643100 | F | -6.10138100 | -1.33061300 | -2.71093300 |
| C  | -4.26243200 | -0.74881500 | -1.32270900 | F | -4.23812400 | 0.44824100  | -1.93344200 |
| C  | -1.30553300 | 2.13402000  | 0.05125500  | C | -0.70721500 | 2.40752200  | -1.16638800 |
| F  | -0.64589600 | 1.43701900  | -2.10509300 | C | -0.09428100 | 3.61239800  | -1.48011000 |
| F  | 0.49609900  | 3.80988500  | -2.65710600 | C | -0.09170000 | 4.62336200  | -0.52572100 |
| F  | 0.48778500  | 5.78907600  | -0.79331600 | C | -0.68048700 | 4.40577500  | 0.71386500  |
| F  | -0.65669900 | 5.36607400  | 1.63558500  | C | -1.27011400 | 3.17127800  | 0.96343600  |

|   |             |             |             |   |             |             |             |
|---|-------------|-------------|-------------|---|-------------|-------------|-------------|
| F | -1.75533300 | 2.97527600  | 2.20999600  | C | 2.00797700  | 1.48718900  | 1.10771200  |
| C | 1.41522500  | 0.32604400  | 1.93270200  | O | -2.30791600 | -0.13067100 | 2.52790700  |
| C | -1.61764700 | -0.95181700 | 3.00213900  | C | 0.92798800  | -0.82188400 | 1.04059200  |
| O | -0.22879400 | -0.81845600 | 0.57306700  | O | -0.96143600 | -1.76780500 | 3.48991100  |
| O | 0.35630700  | 0.77738500  | 2.73845300  | C | 3.05786300  | 1.12289500  | 0.08653600  |
| C | 4.40688400  | 1.02529600  | 0.43986400  | C | 2.69363700  | 0.91588700  | -1.24759600 |
| C | 5.37500300  | 0.73637500  | -0.51930800 | C | 3.66054200  | 0.63376100  | -2.21018700 |
| C | 5.00339600  | 0.54701600  | -1.84935600 | H | 2.40619300  | 2.20463700  | 1.83293600  |
| H | 1.17381300  | 1.97522400  | 0.59403400  | H | 2.16660500  | -0.05979900 | 2.62630100  |
| H | 4.70353000  | 1.20312500  | 1.47208600  | H | 1.64945000  | 1.00056000  | -1.54249100 |
| H | 6.42093200  | 0.67620200  | -0.23164800 | H | 3.36351100  | 0.49390100  | -3.24472900 |
| H | 5.75884600  | 0.34173800  | -2.60167400 | C | 8.74445600  | -3.32757000 | -1.54256200 |
| C | 7.83461400  | -3.02989800 | -0.35382700 | C | 6.36415700  | -2.92901900 | -0.75258900 |
| C | 5.44286300  | -2.64410300 | 0.43024300  | C | 3.98611800  | -2.47223900 | 0.00971800  |
| C | 3.09984300  | -2.11347100 | 1.19641900  | N | 1.73072900  | -1.84712700 | 0.76658100  |
| H | 8.47606900  | -4.28055900 | -2.01049700 | H | 8.65655500  | -2.54720500 | -2.30604100 |
| H | 9.79395700  | -3.38532900 | -1.24087300 | H | 7.95147600  | -3.81162200 | 0.40761000  |
| H | 8.14248300  | -2.08913500 | 0.12193700  | H | 6.24202600  | -2.13128200 | -1.49891800 |
| H | 6.05287200  | -3.86129300 | -1.24418200 | H | 5.77682400  | -1.72530900 | 0.93298800  |
| H | 5.52841300  | -3.45328700 | 1.16878300  | H | 3.90508900  | -1.67494000 | -0.73776100 |
| H | 3.62065000  | -3.39663900 | -0.45854800 | H | 3.50004000  | -1.22118300 | 1.67757700  |
| H | 3.09086300  | -2.92201100 | 1.93774600  | H | 1.29625300  | -2.54463100 | 0.16846300  |
| H | -0.15489200 | 1.45547500  | 2.26607200  |   |             |             |             |

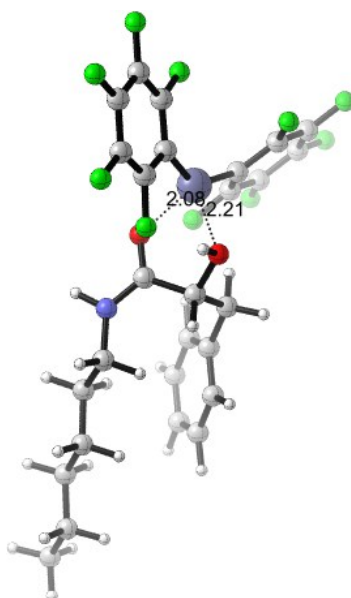

### INT-5

|    |             |             |             |   |             |             |             |
|----|-------------|-------------|-------------|---|-------------|-------------|-------------|
| C  | 1.43059800  | 0.96989500  | 1.38304600  | C | 0.98564800  | -0.49115700 | 1.24461800  |
| C  | 1.02064200  | -0.90983400 | -0.22993000 | O | 0.06245600  | -0.58872800 | -0.95165600 |
| O  | -0.36676600 | -0.53272300 | 1.68410700  | C | 2.85415500  | 1.24199600  | 0.95981300  |
| C  | 3.92865500  | 0.84381600  | 1.76247400  | C | 3.11567800  | 1.93525000  | -0.22450600 |
| C  | 5.23873200  | 1.13683100  | 1.39261800  | C | 4.42590700  | 2.23843000  | -0.59158000 |
| C  | 5.48918200  | 1.84239200  | 0.21609700  | C | 9.59481800  | -1.31718500 | -0.72992900 |
| C  | 8.34007900  | -1.83772100 | -0.03444400 | C | 7.06187800  | -1.48746200 | -0.79281700 |
| C  | 5.80088400  | -2.00895000 | -0.10948700 | C | 4.52533900  | -1.57032900 | -0.82294900 |
| C  | 3.27982800  | -2.04215000 | -0.08336900 | N | 2.06307400  | -1.56747100 | -0.73477500 |
| Zn | -1.69304000 | -0.00009900 | -0.00256400 | C | -1.92286600 | 1.98613600  | -0.07948300 |
| C  | -1.07649000 | 2.85160400  | -0.74760800 | C | -2.99897600 | 2.58881600  | 0.55027000  |
| C  | -1.25653700 | 4.22710300  | -0.80489800 | C | -3.24062500 | 3.95700300  | 0.52346900  |
| C  | -2.35768800 | 4.77922500  | -0.16413100 | F | 0.01786300  | 2.36439900  | -1.38067700 |
| F  | -0.40050300 | 5.01641100  | -1.45754500 | F | -2.56238000 | 6.09393400  | -0.20492800 |
| F  | -4.29358600 | 4.49169000  | 1.14216600  | F | -3.87443600 | 1.83651100  | 1.24017900  |
| H  | 1.27703800  | 1.24147900  | 2.43270200  | H | 0.73946200  | 1.57065400  | 0.78309900  |
| H  | 1.59220100  | -1.15073500 | 1.87153600  | H | 3.73568600  | 0.32290200  | 2.69906500  |
| H  | 2.28315600  | 2.26065900  | -0.84232400 | H | 6.06361600  | 0.83245300  | 2.03052500  |
| H  | 4.61365500  | 2.79281200  | -1.50571900 | H | 6.50914200  | 2.08934000  | -0.06257100 |

|               |             |             |               |             |             |
|---------------|-------------|-------------|---------------|-------------|-------------|
| H 9.69168900  | -1.74605500 | -1.73280000 | H 9.55799000  | -0.22780900 | -0.83761700 |
| H 10.49897100 | -1.56888500 | -0.16881600 | H 8.40571600  | -2.92708800 | 0.08335300  |
| H 8.27889700  | -1.42183000 | 0.98017400  | H 6.98563500  | -0.39577400 | -0.89476200 |
| H 7.11943300  | -1.88928900 | -1.81399200 | H 5.77284400  | -1.63882500 | 0.92512400  |
| H 5.84021500  | -3.10549500 | -0.04823300 | H 4.49407700  | -0.47720300 | -0.89515900 |
| H 4.51676500  | -1.96459600 | -1.84866600 | H 3.30862000  | -1.65644700 | 0.93648100  |
| H 3.25072100  | -3.13740600 | -0.02814700 | H 1.97456600  | -1.75215100 | -1.72986300 |
| C -2.80062500 | -1.69018300 | -0.02694300 | C -4.08319800 | -1.71386400 | -0.55036500 |
| C -2.32769600 | -2.92193900 | 0.37829800  | C -4.85133300 | -2.86773100 | -0.65869900 |
| C -3.03647500 | -4.11161300 | 0.30345200  | C -4.31891800 | -4.07545600 | -0.22654600 |
| F -1.06275400 | -3.02831700 | 0.90426900  | F -2.51476100 | -5.26737100 | 0.71828200  |
| F -5.03301200 | -5.19400400 | -0.32020600 | F -6.07831400 | -2.84023800 | -1.17646400 |
| F -4.64451600 | -0.57934200 | -0.99712100 | H -0.63192200 | -1.46441900 | 1.79688900  |

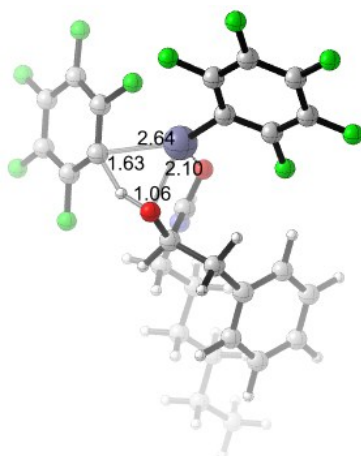

**TS-2**

|               |             |             |               |             |             |
|---------------|-------------|-------------|---------------|-------------|-------------|
| C -0.84073200 | -1.80757700 | 1.46904400  | C -0.77594100 | -0.27728600 | 1.34532500  |
| C -0.89700200 | 0.11946500  | -0.13414600 | O 0.11735700  | 0.00470500  | -0.86925900 |
| O 0.49067200  | 0.13041000  | 1.82507300  | C -2.04994800 | -2.43990000 | 0.82382000  |
| C -3.27667600 | -2.51248400 | 1.49024900  | C -1.94910000 | -2.97311000 | -0.46474400 |
| C -4.37679300 | -3.12065300 | 0.88849600  | C -3.04515800 | -3.58689700 | -1.06663600 |
| C -4.26015900 | -3.66647200 | -0.38918900 | C -9.24622000 | -1.61036100 | -0.80324000 |

|                |             |             |               |             |             |
|----------------|-------------|-------------|---------------|-------------|-------------|
| C -8.17436100  | -0.83258800 | -0.04430100 | C -6.85038100 | -0.76998300 | -0.80220700 |
| C -5.76645700  | -0.00099700 | -0.05157500 | C -4.43411600 | 0.00019400  | -0.79551200 |
| C -3.34204200  | 0.70083300  | 0.00263800  | N -2.04244200 | 0.53531700  | -0.64577400 |
| Zn 1.80082600  | 0.21705600  | 0.18294500  | C 3.33632400  | -1.02277300 | 0.01580600  |
| C 3.07817600   | -2.33744600 | -0.32893000 | C 4.66865600  | -0.70646000 | 0.21571600  |
| C 4.06272200   | -3.30345100 | -0.48157300 | C 5.69797400  | -1.62996200 | 0.07573000  |
| C 5.38654700   | -2.93681800 | -0.27685200 | F 1.80113000  | -2.73465300 | -0.53579700 |
| F 3.76393700   | -4.55837100 | -0.81837000 | F 6.35537100  | -3.83746000 | -0.41683700 |
| F 6.96964600   | -1.28449200 | 0.27143800  | F 5.01908700  | 0.54132300  | 0.56290000  |
| H -0.79481300  | -2.03998500 | 2.53741200  | H 0.07279500  | -2.19947400 | 1.00824900  |
| H -1.55501400  | 0.20719000  | 1.93902100  | H -3.36406600 | -2.10969500 | 2.49767100  |
| H -0.99377000  | -2.92486900 | -0.98324500 | H -5.32137300 | -3.18086700 | 1.42203100  |
| H -2.94585100  | -4.01310600 | -2.05998800 | H -5.11210300 | -4.15515700 | -0.85204300 |
| H -9.44806300  | -1.14846000 | -1.77540700 | H -8.92421600 | -2.64113800 | -0.98655100 |
| H -10.18679100 | -1.64636700 | -0.24668400 | H -8.52684200 | 0.18773000  | 0.15428100  |
| H -8.00517700  | -1.29573800 | 0.93686400  | H -6.49081100 | -1.79084700 | -0.99520200 |
| H -7.01333600  | -0.30944100 | -1.78648500 | H -5.61900700 | -0.46090400 | 0.93596500  |
| H -6.09970300  | 1.03026300  | 0.12922600  | H -4.11608500 | -1.03211700 | -0.98265800 |
| H -4.55220200  | 0.48695600  | -1.77352400 | H -3.29177900 | 0.25973400  | 0.99806700  |
| H -3.54345300  | 1.77149800  | 0.12092400  | H -1.99273800 | 0.75008900  | -1.63805600 |
| C 0.67058800   | 2.53189000  | 0.76268400  | C 1.64534200  | 3.00344900  | -0.07587300 |
| C -0.42057500  | 3.36545000  | 0.89445300  | C 1.64260300  | 4.22879800  | -0.72087200 |
| C -0.51268600  | 4.61216400  | 0.28681200  | C 0.53702000  | 5.04734600  | -0.51610900 |
| F -1.49281100  | 2.95827300  | 1.61781600  | F -1.58520900 | 5.39058000  | 0.43916100  |
| F 0.47001200   | 6.23552500  | -1.11180500 | F 2.62728000  | 4.62303800  | -1.52573200 |
| F 2.69986300   | 2.14257000  | -0.34953800 | H 0.53210600  | 1.18167400  | 1.67247500  |

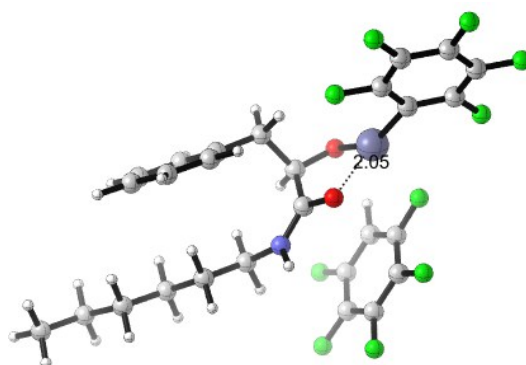

### INT-6

|    |             |             |             |   |             |             |             |
|----|-------------|-------------|-------------|---|-------------|-------------|-------------|
| C  | -0.58492600 | -1.74033600 | 1.71086900  | C | -0.53845700 | -0.19396600 | 1.56601900  |
| C  | -0.61290800 | 0.13888800  | 0.06324600  | O | 0.46481700  | 0.12349600  | -0.58312600 |
| O  | 0.64432900  | 0.28620100  | 2.08406500  | C | -1.73893000 | -2.46096300 | 1.06197300  |
| C  | -2.98519300 | -2.56053600 | 1.68921900  | C | -1.56781600 | -3.07039400 | -0.18564300 |
| C  | -4.02863800 | -3.26737300 | 1.09431200  | C | -2.60484100 | -3.78536200 | -0.77990200 |
| C  | -3.83713800 | -3.89066300 | -0.13814300 | C | -8.80374000 | -2.15181600 | -1.10173300 |
| C  | -7.82122800 | -1.29874600 | -0.30377000 | C | -6.45863100 | -1.18617800 | -0.98350400 |
| C  | -5.46909600 | -0.32537400 | -0.20296500 | C | -4.08401300 | -0.30433000 | -0.84263800 |
| C  | -3.10164300 | 0.52693300  | -0.02794000 | N | -1.74835800 | 0.42793300  | -0.56682500 |
| Zn | 1.99331600  | 0.18247800  | 0.77782200  | C | 3.74783500  | -0.50323000 | 0.22954800  |
| C  | 3.73839800  | -1.79379800 | -0.26854700 | C | 4.97496300  | 0.13267200  | 0.23692800  |
| C  | 4.86859100  | -2.44298600 | -0.74286500 | C | 6.14122900  | -0.46737800 | -0.22290000 |
| C  | 6.08034300  | -1.76457500 | -0.71614700 | F | 2.57372900  | -2.47858700 | -0.30499800 |
| F  | 4.81481900  | -3.68657300 | -1.22057500 | F | 7.18288700  | -2.35777900 | -1.16604700 |
| F  | 7.30846800  | 0.17598600  | -0.20200900 | F | 5.07944300  | 1.38953700  | 0.69963400  |
| H  | -0.55011200 | -1.93815500 | 2.78668800  | H | 0.35794500  | -2.10853100 | 1.28716800  |
| H  | -1.40121300 | 0.25027800  | 2.08564600  | H | -3.12887100 | -2.10101500 | 2.66540300  |
| H  | -0.59985000 | -3.00072700 | -0.67829600 | H | -4.98736400 | -3.34604800 | 1.59967600  |
| H  | -2.44745600 | -4.26747400 | -1.73980500 | H | -4.64368100 | -4.45749700 | -0.59341200 |
| H  | -8.97626500 | -1.72179600 | -2.09397300 | H | -8.41370500 | -3.16547700 | -1.24328100 |
| H  | -9.77076300 | -2.23138600 | -0.59725900 | H | -8.23774800 | -0.29416900 | -0.15539800 |
| H  | -7.68732000 | -1.72738800 | 0.69827200  | H | -6.03118000 | -2.19052800 | -1.11208600 |

|               |             |             |               |             |             |
|---------------|-------------|-------------|---------------|-------------|-------------|
| H -6.58603300 | -0.77334500 | -1.99394000 | H -5.37847200 | -0.71818200 | 0.81946300  |
| H -5.85974100 | 0.69777300  | -0.11246500 | H -3.69530500 | -1.32577700 | -0.91911900 |
| H -4.15040900 | 0.09739200  | -1.86352200 | H -3.09104200 | 0.16843900  | 1.00184500  |
| H -3.40631600 | 1.58227400  | -0.01093500 | H -1.63856600 | 0.57531600  | -1.56661200 |
| C -0.19895100 | 2.99682800  | 1.37904000  | C 0.72263000  | 2.92722500  | 0.34988200  |
| C -1.48096600 | 3.41859800  | 1.06550900  | C 0.40811400  | 3.25813500  | -0.95822700 |
| C -1.83040500 | 3.76614700  | -0.23329400 | C -0.88333300 | 3.68377200  | -1.24604000 |
| F -2.42974200 | 3.45307400  | 2.00017800  | F -3.07956200 | 4.12294700  | -0.52192800 |
| F -1.22070800 | 3.98693100  | -2.49341000 | F 1.30603700  | 3.13794500  | -1.92588200 |
| F 1.96697900  | 2.45122000  | 0.58351900  | H 0.06067800  | 2.64908100  | 2.37147000  |

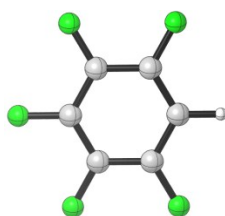

**C<sub>6</sub>F<sub>5</sub>H**

|               |             |             |               |             |             |
|---------------|-------------|-------------|---------------|-------------|-------------|
| C 0.00008500  | 1.12408500  | -0.00011900 | C -1.20814400 | 0.42648000  | -0.00057200 |
| C -1.20832500 | -0.96823200 | 0.00002800  | C 0.00013100  | -1.66597900 | -0.00011900 |
| C 1.20803100  | -0.96847400 | -0.00014500 | C 1.20803900  | 0.42666400  | 0.00025100  |
| H -0.00026200 | -2.76565900 | 0.00029500  | F 2.37735100  | -1.64315200 | -0.00029700 |
| F 2.37727100  | 1.10149400  | 0.00046900  | F -0.00000900 | 2.47408500  | -0.00014700 |
| F -2.37706600 | 1.10184700  | 0.00002400  | F -2.37739600 | -1.64334200 | 0.00036800  |

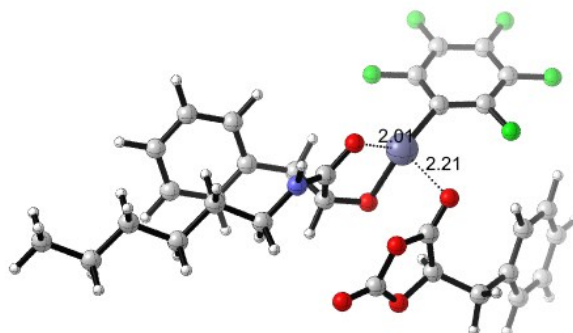

**INT-7'**

|              |            |             |              |             |             |
|--------------|------------|-------------|--------------|-------------|-------------|
| C 1.59316300 | 1.02933300 | 1.37065700  | C 1.27549100 | -0.23061200 | 0.52622200  |
| C 1.60361000 | 0.07866500 | -0.94678100 | O 0.71813100 | 0.66727400  | -1.62393000 |

|    |             |             |             |   |             |             |             |
|----|-------------|-------------|-------------|---|-------------|-------------|-------------|
| O  | -0.06515700 | -0.53965200 | 0.62496000  | C | 3.01647300  | 1.52449000  | 1.33257400  |
| C  | 4.02203000  | 0.87691600  | 2.05922400  | C | 3.35663300  | 2.65696100  | 0.58684900  |
| C  | 5.32853100  | 1.35929600  | 2.05634100  | C | 4.66002600  | 3.14953100  | 0.58855300  |
| C  | 5.64845500  | 2.50502000  | 1.32845900  | C | 10.13753600 | -0.01375900 | 0.04537300  |
| C  | 8.83408400  | -0.79946200 | 0.15986200  | C | 7.67706100  | -0.12874000 | -0.57741900 |
| C  | 6.36652600  | -0.90120500 | -0.45860800 | C | 5.20053500  | -0.19586300 | -1.14640400 |
| C  | 3.89745300  | -0.95749500 | -0.94447500 | N | 2.76129500  | -0.23421400 | -1.51132200 |
| Zn | -1.05645000 | 0.49891000  | -0.68597000 | C | -2.65285500 | 1.66164100  | -0.59017300 |
| C  | -2.51854800 | 2.88798600  | 0.03572100  | C | -3.94252900 | 1.32551600  | -0.96066500 |
| C  | -3.57820900 | 3.74709900  | 0.29308200  | C | -5.04514300 | 2.13231700  | -0.71175100 |
| C  | -4.85711100 | 3.35514200  | -0.08182600 | F | -1.29511800 | 3.29624000  | 0.43476400  |
| F  | -3.39495500 | 4.92158800  | 0.89672100  | F | -5.89662000 | 4.14946300  | 0.16125700  |
| F  | -6.27433700 | 1.73952600  | -1.05579300 | F | -4.19384100 | 0.16213900  | -1.59037000 |
| H  | 1.29756600  | 0.77498100  | 2.39355400  | H | 0.90958900  | 1.81750200  | 1.03042400  |
| H  | 1.89920900  | -1.06652300 | 0.87715500  | H | 3.76952400  | -0.00054700 | 2.65172800  |
| H  | 2.58271900  | 3.16952300  | 0.02006400  | H | 6.09565500  | 0.85072000  | 2.63371700  |
| H  | 4.90129000  | 4.04110900  | 0.01807800  | H | 6.66240900  | 2.89326200  | 1.34174900  |
| H  | 10.43777400 | 0.09403500  | -1.00231600 | H | 10.02431700 | 0.99254100  | 0.46274000  |
| H  | 10.95393200 | -0.50855900 | 0.57896800  | H | 8.97622200  | -1.81350800 | -0.23539000 |
| H  | 8.56476600  | -0.91730000 | 1.21800900  | H | 7.52916500  | 0.88490900  | -0.17921700 |
| H  | 7.93921200  | -0.00837300 | -1.63798300 | H | 6.12198100  | -1.03085600 | 0.60515500  |
| H  | 6.49245000  | -1.91043200 | -0.87464300 | H | 5.08398200  | 0.81432300  | -0.73836800 |
| H  | 5.40909100  | -0.09062000 | -2.22049100 | H | 3.72232900  | -1.09313500 | 0.12278200  |
| H  | 3.94065600  | -1.95436100 | -1.39744400 | H | 2.82621800  | 0.03159100  | -2.48983000 |
| C  | -2.44597200 | -4.08515000 | 0.14360700  | C | -1.28862100 | -3.09273400 | 0.32242600  |
| O  | 0.24582000  | -2.52399500 | -1.31900000 | C | 0.86218800  | -3.34841200 | -0.39079400 |
| C  | -1.00172900 | -2.23661200 | -0.88804700 | O | -1.71826500 | -1.45880100 | -1.47062300 |
| O  | 2.01698200  | -3.61667100 | -0.43363600 | O | -0.03378300 | -3.76691200 | 0.50264200  |
| C  | -3.75345400 | -3.50923900 | 0.64442500  | C | -4.34285600 | -4.02678800 | 1.79824000  |
| C  | -4.35731800 | -2.42517000 | 0.00120100  | C | -5.51677900 | -3.47286900 | 2.30274100  |



|   |             |             |             |   |             |             |             |
|---|-------------|-------------|-------------|---|-------------|-------------|-------------|
| C | -5.52305100 | -1.86066500 | 0.51189300  | C | -6.10619800 | -2.38578200 | 1.66321000  |
| H | -2.18177200 | -4.97314800 | 0.72584000  | H | -2.51795700 | -4.39489500 | -0.90549000 |
| H | -1.44414800 | -2.43341100 | 1.17917000  | H | -3.87950300 | -4.86827800 | 2.30726300  |
| H | -3.91456700 | -2.00812100 | -0.89598300 | H | -5.96630600 | -3.88842200 | 3.19922200  |
| H | -5.96694200 | -1.00914500 | 0.00403400  | H | -7.01695300 | -1.94934600 | 2.06104600  |

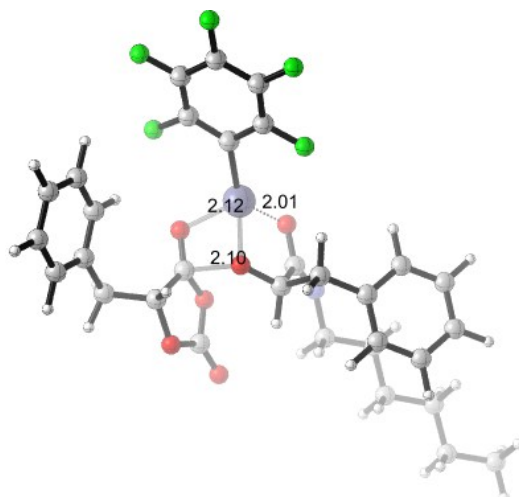

### INT-7''

|    |             |             |             |   |              |             |             |
|----|-------------|-------------|-------------|---|--------------|-------------|-------------|
| C  | -1.50281000 | -0.97248600 | 1.34756400  | C | -1.23360900  | 0.24394600  | 0.43036500  |
| C  | -1.56818000 | -0.14774500 | -1.01915300 | O | -0.68078400  | -0.75668900 | -1.67411400 |
| O  | 0.10840200  | 0.57802400  | 0.50142700  | C | -2.91612800  | -1.49855600 | 1.34385100  |
| C  | -3.93084300 | -0.83802500 | 2.04535100  | C | -3.23465900  | -2.67045400 | 0.65240200  |
| C  | -5.22724500 | -1.34630100 | 2.07029200  | C | -4.52796600  | -3.18795200 | 0.68212600  |
| C  | -5.52633200 | -2.52992600 | 1.39640500  | C | -10.08351500 | -0.10781900 | 0.10117900  |
| C  | -8.79091300 | 0.70208800  | 0.15520000  | C | -7.63737800  | 0.01520000  | -0.57252700 |
| C  | -6.33540000 | 0.80891200  | -0.51131400 | C | -5.17405400  | 0.08612100  | -1.18853100 |
| C  | -3.87190700 | 0.86083900  | -1.03720500 | N | -2.74145300  | 0.10752800  | -1.57708200 |
| Zn | 1.12463200  | -0.49278700 | -0.83354500 | C | 2.71426300   | -1.64722800 | -0.63401300 |
| C  | 2.57677700  | -2.84695100 | 0.04005800  | C | 4.00932100   | -1.30226400 | -0.97597600 |
| C  | 3.64158700  | -3.67472800 | 0.36913700  | C | 5.11624000   | -2.07758200 | -0.65560500 |
| C  | 4.92570400  | -3.27548400 | 0.02014400  | F | 1.34716400   | -3.25801000 | 0.41704300  |
| F  | 3.45786900  | -4.82613400 | 1.01526200  | F | 5.96901200   | -4.03978400 | 0.33259300  |
| F  | 6.34976600  | -1.67944100 | -0.97462000 | F | 4.25709800   | -0.15930700 | -1.64347200 |
| H  | -1.20689600 | -0.65597000 | 2.35271300  | H | -0.80379300  | -1.76124800 | 1.04285100  |

|               |             |             |               |             |             |
|---------------|-------------|-------------|---------------|-------------|-------------|
| H -1.86495000 | 1.08569100  | 0.74830800  | H -3.69451700 | 0.07059700  | 2.59615000  |
| H -2.45239300 | -3.19223500 | 0.10589400  | H -6.00233700 | -0.82739500 | 2.62732800  |
| H -4.75287200 | -4.10935400 | 0.15400400  | H -6.53224300 | -2.93721500 | 1.43183700  |
| H-10.40105000 | -0.26760400 | -0.93474100 | H -9.94648100 | -1.09248300 | 0.56092500  |
| H-10.89782500 | 0.39802900  | 0.62742300  | H -8.95611500 | 1.69467900  | -0.28305700 |
| H -8.50424900 | 0.87249900  | 1.20156400  | H -7.46847300 | -0.97804000 | -0.13305200 |
| H -7.91616300 | -0.15568600 | -1.62184400 | H -6.07395200 | 0.98818200  | 0.54120400  |
| H -6.48117700 | 1.79730000  | -0.96842300 | H -5.04374500 | -0.90628400 | -0.74218700 |
| H -5.39768300 | -0.06418200 | -2.25409300 | H -3.68845100 | 1.05217700  | 0.01987800  |
| H -3.91816100 | 1.83412100  | -1.53881000 | H -2.81788100 | -0.21208100 | -2.53854100 |
| C 2.24882300  | 4.04661800  | 0.13331100  | C 1.12256000  | 3.04915800  | 0.44163900  |
| O -0.44597500 | 2.50744900  | -1.18351300 | C -1.02862600 | 3.35535200  | -0.26784800 |
| C 0.78995500  | 2.13862600  | -0.72343600 | O 1.55286500  | 1.49641300  | -1.43153300 |
| O -2.16716300 | 3.69254400  | -0.32263100 | O -0.13269300 | 3.71522600  | 0.65458200  |
| C 3.59008800  | 3.52303600  | 0.60212400  | C 4.19630400  | 4.08043700  | 1.72885700  |
| C 4.20990400  | 2.44536000  | -0.03746000 | C 5.40092200  | 3.57342200  | 2.21011500  |
| C 5.40843600  | 1.92962000  | 0.44904700  | C 6.00692300  | 2.49380100  | 1.57352700  |
| H 2.00197300  | 4.96976100  | 0.66675700  | H 2.26092700  | 4.27910500  | -0.93773600 |
| H 1.34696400  | 2.45696300  | 1.32817500  | H 3.72212000  | 4.91818100  | 2.23428500  |
| H 3.75288900  | 1.99871400  | -0.91305800 | H 5.86276000  | 4.02102200  | 3.08473000  |
| H 5.86750300  | 1.08547800  | -0.05724200 | H 6.94262100  | 2.09430800  | 1.95193300  |

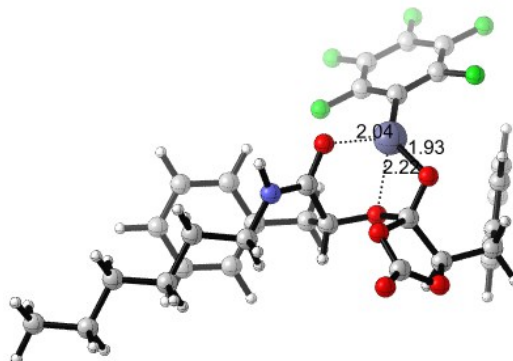

**TS3**

|               |             |            |               |            |            |
|---------------|-------------|------------|---------------|------------|------------|
| C -1.05547400 | -0.53025200 | 1.30091200 | C -1.08282100 | 0.66429400 | 0.33666900 |
|---------------|-------------|------------|---------------|------------|------------|

|                |             |             |               |             |             |
|----------------|-------------|-------------|---------------|-------------|-------------|
| C -1.36160200  | 0.18419500  | -1.09336800 | O -0.40918800 | -0.29440600 | -1.74951400 |
| O 0.22521000   | 1.20912600  | 0.36131600  | C -2.31818400 | -1.35911700 | 1.29165600  |
| C -3.44301200  | -0.97775000 | 2.02937800  | C -2.36773900 | -2.54036500 | 0.54629400  |
| C -4.59048200  | -1.76874300 | 2.03434700  | C -3.51078900 | -3.33670800 | 0.55527100  |
| C -4.62275900  | -2.95513300 | 1.30324300  | C -9.67065300 | -1.31605800 | 0.38227100  |
| C -8.53692300  | -0.29498400 | 0.41587000  | C -7.32910200 | -0.73256400 | -0.40967100 |
| C -6.18733700  | 0.27955900  | -0.38051100 | C -4.95502600 | -0.20600600 | -1.13844900 |
| C -3.80249500  | 0.78474400  | -1.03115800 | N -2.58046300 | 0.23150200  | -1.60787100 |
| Zn 1.47798300  | 0.20736900  | -1.17566800 | C 2.74298400  | -1.28028200 | -0.88622600 |
| C 2.32759500   | -2.50029100 | -0.38375300 | C 4.10783200  | -1.14990400 | -1.06859600 |
| C 3.19212700   | -3.53795100 | -0.06187600 | C 5.02362800  | -2.14413600 | -0.75285800 |
| C 4.55561300   | -3.34994200 | -0.24669400 | F 1.01199700  | -2.72695400 | -0.16821200 |
| F 2.74207700   | -4.69450100 | 0.42456800  | F 5.40957700  | -4.32067200 | 0.06370500  |
| F 6.33317800   | -1.95296100 | -0.91260000 | F 4.61451700  | -0.00355600 | -1.56078500 |
| H -0.85302400  | -0.13058200 | 2.29959400  | H -0.20262700 | -1.15544300 | 1.01728000  |
| H -1.80495400  | 1.41813900  | 0.65457000  | H -3.41220500 | -0.06599000 | 2.62324100  |
| H -1.49277000  | -2.84478100 | -0.02291200 | H -5.45423800 | -1.46642500 | 2.61978300  |
| H -3.52814900  | -4.25985200 | -0.01536800 | H -5.51051200 | -3.57992700 | 1.31937200  |
| H -10.02375400 | -1.47406800 | -0.64221200 | H -9.33535000 | -2.28389600 | 0.77029600  |
| H -10.52350800 | -0.99036600 | 0.98424600  | H -8.89812500 | 0.67279700  | 0.04524700  |
| H -8.22002400  | -0.12724200 | 1.45398400  | H -6.95871700 | -1.69623300 | -0.03196800 |
| H -7.63949200  | -0.90788200 | -1.44917900 | H -5.90528100 | 0.47121100  | 0.66478900  |
| H -6.53110800  | 1.23860000  | -0.79180700 | H -4.62295900 | -1.16604400 | -0.72633600 |
| H -5.20571200  | -0.37413100 | -2.19488500 | H -3.62415500 | 1.00126600  | 0.02227100  |
| H -4.03227900  | 1.73313800  | -1.53118800 | H -2.63584300 | -0.11737000 | -2.56024700 |
| C 2.22870000   | 4.01824700  | 0.60967200  | C 0.77042300  | 3.60737900  | 0.53974300  |
| O -0.74445300  | 2.81762100  | -1.02947400 | C -0.96248600 | 4.14197400  | -0.83856500 |
| C 0.50746600   | 2.42619700  | -0.41957600 | O 1.43926900  | 2.13793700  | -1.28813200 |
| O -1.86085800  | 4.75056200  | -1.32952700 | O -0.03266600 | 4.65615400  | -0.01244200 |
| C 3.04724800   | 2.96893600  | 1.32976400  | C 2.96449800  | 2.84989600  | 2.71965800  |

|              |            |             |              |            |             |
|--------------|------------|-------------|--------------|------------|-------------|
| C 3.88426600 | 2.09720600 | 0.62889900  | C 3.70183600 | 1.88386600 | 3.39759800  |
| C 4.63495300 | 1.13801700 | 1.30645900  | C 4.54247300 | 1.02665400 | 2.69130200  |
| H 2.28514700 | 4.97627800 | 1.13772300  | H 2.59290300 | 4.16238700 | -0.41037000 |
| H 0.37945900 | 3.36772600 | 1.53573800  | H 2.32549100 | 3.53123400 | 3.27834100  |
| H 3.95125300 | 2.17749100 | -0.45198800 | H 3.62848400 | 1.80736500 | 4.47826500  |
| H 5.29990600 | 0.48798400 | 0.74608500  | H 5.12672900 | 0.27900600 | 3.21865700  |
